# Supplementary material for: Intestinal miRNAs regulated in response to dietary lipids
Source: PubMed Central journal article supplement (PMC7642330; doi:10.1038/s41598-020-75751-w), 2020-11-03
Supplement: 41598_2020_75751_MOESM1_ESM.pdf [file 41598_2020_75751_MOESM1_ESM.pdf]

# Intestinal miRNAs regulated in response to dietary lipids

**Judit Gil-Zamorano<sup>1</sup>, João Tomé-Carneiro<sup>2</sup>, María-Carmen López de las Hazas<sup>1</sup>, Lorena del Pozo-Acebo<sup>1</sup>, M. Carmen Crespo<sup>2</sup>, Diego Gómez-Coronado<sup>3,4</sup>, Luis A. Chapado<sup>1</sup>, Emilio Herrera<sup>5</sup>; María-Jesús Latasa<sup>1</sup>, María Belén Ruiz-Roso<sup>1</sup>, Mónica Castro-Camarero<sup>6</sup>, Olivier Briand<sup>7</sup>, Alberto Dávalos<sup>1\*</sup>.**

<sup>1</sup> Laboratory of Epigenetics of Lipid Metabolism, Madrid Institute for Advanced Studies Food (IMDEA Food), CEI UAM + CSIC, 28049 Madrid, Spain.

<sup>2</sup> Laboratory of Functional Foods, Madrid Institute for Advanced Studies Food (IMDEA Food), CEI UAM CSIC, 28049 Madrid, Spain.

<sup>3</sup> Servicio de Bioquímica-Investigación, Hospital Universitario Ramón y Cajal, IRYCIS, 28034 Madrid, Spain

<sup>4</sup> Centre of Biomedical Research in Physiopathology of Obesity and Nutrition (CIBEROBN), Instituto de Salud Carlos III, 28029 Madrid, Spain.

<sup>5</sup> Department of Biochemistry and Chemistry, Faculties of Pharmacy and Medicine, Universidad San Pablo CEU, 28668 Madrid, Spain.

<sup>6</sup> Servicio de Cirugía Experimental, Hospital Universitario Ramón y Cajal, IRYCIS, 28034 Madrid, Spain

<sup>7</sup> Univ. Lille, Inserm, CHU Lille, Institut Pasteur de Lille, U1011- EGID, F-59000 Lille, France.

\* Correspondence to: Dr. Alberto Dávalos, Laboratory of Epigenetics of Lipid Metabolism. IMDEA Food Institute. Carretera de Canto Blanco, 8. 28049 Madrid (Spain).

E-mail: [alberto.davalos@imdea.org](mailto:alberto.davalos@imdea.org)

Tel. +34912796985

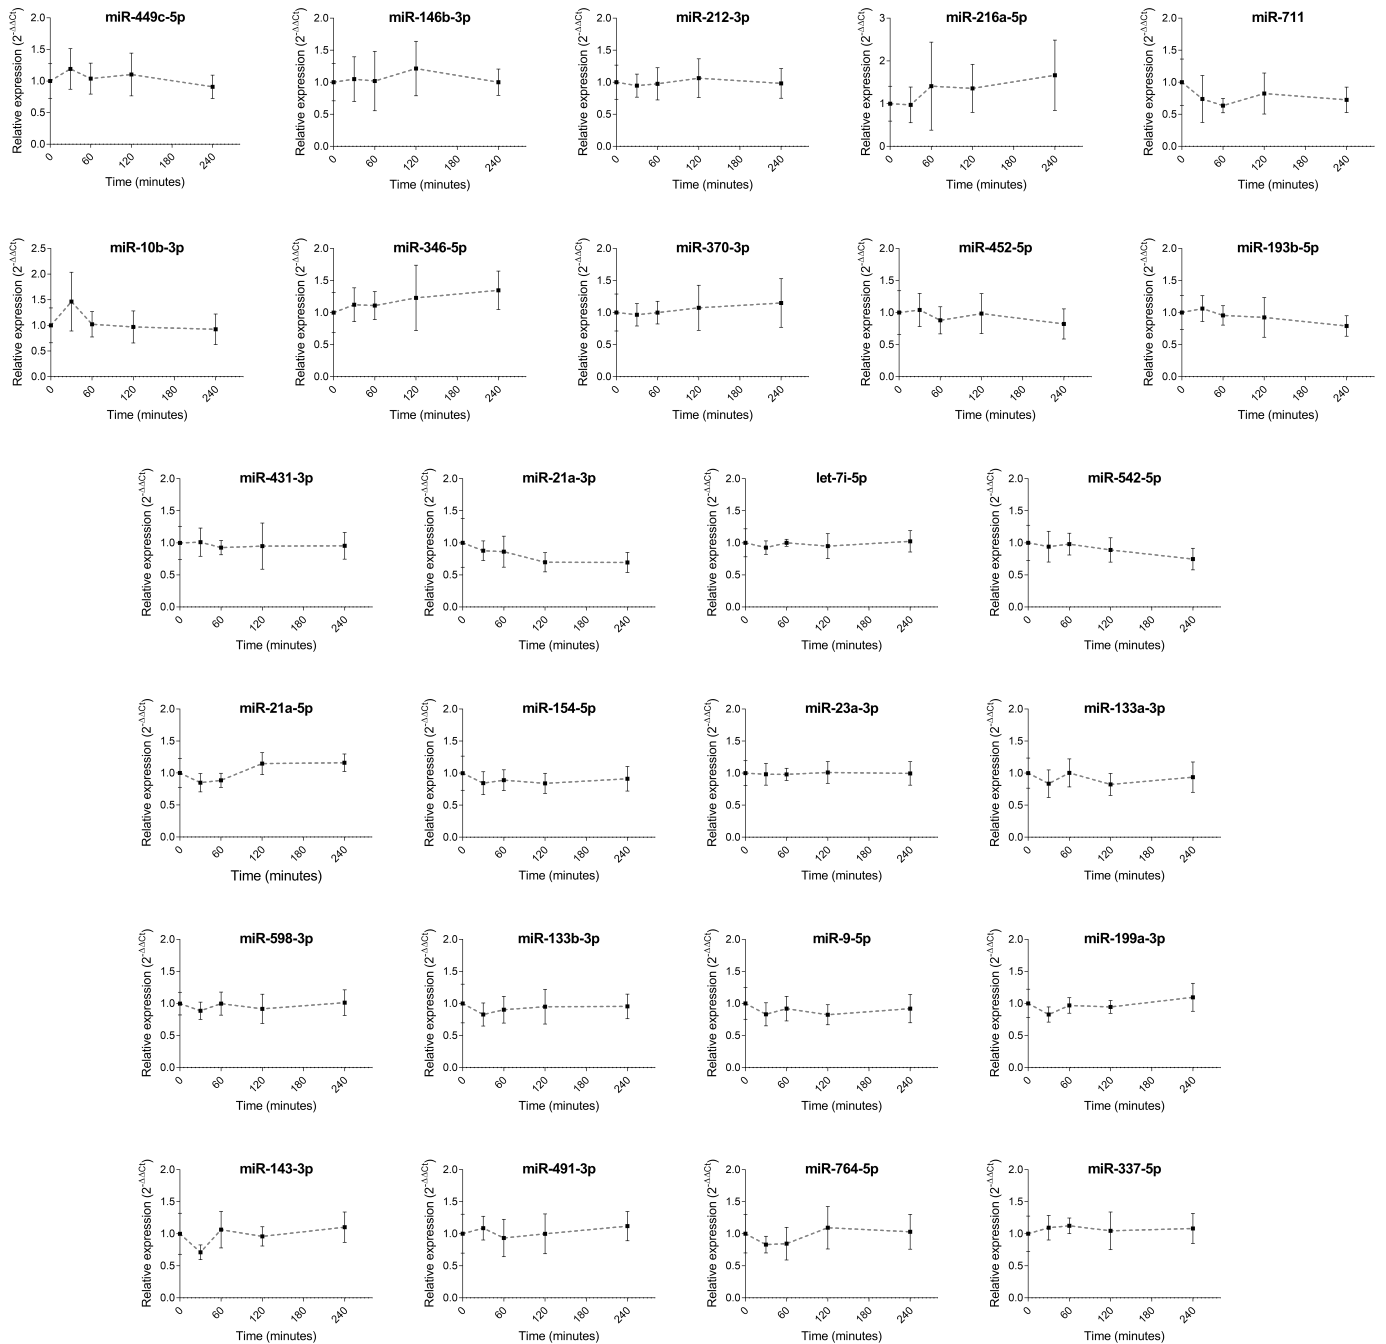

**Supplementary Figure 1.** Time-course (0, 60, 120 and 240 minutes) expression of miRNAs showing non-significant differences (i.e. 26 out of the 35 previously selected, please see figure 1E) in response to an oral lipid challenge (250  $\mu$ L olive oil enriched with 40 mg of cholesterol) administered to male C57BL/6 mice;  $n \geq 7$ . Data are shown as mean  $\pm$  SD.

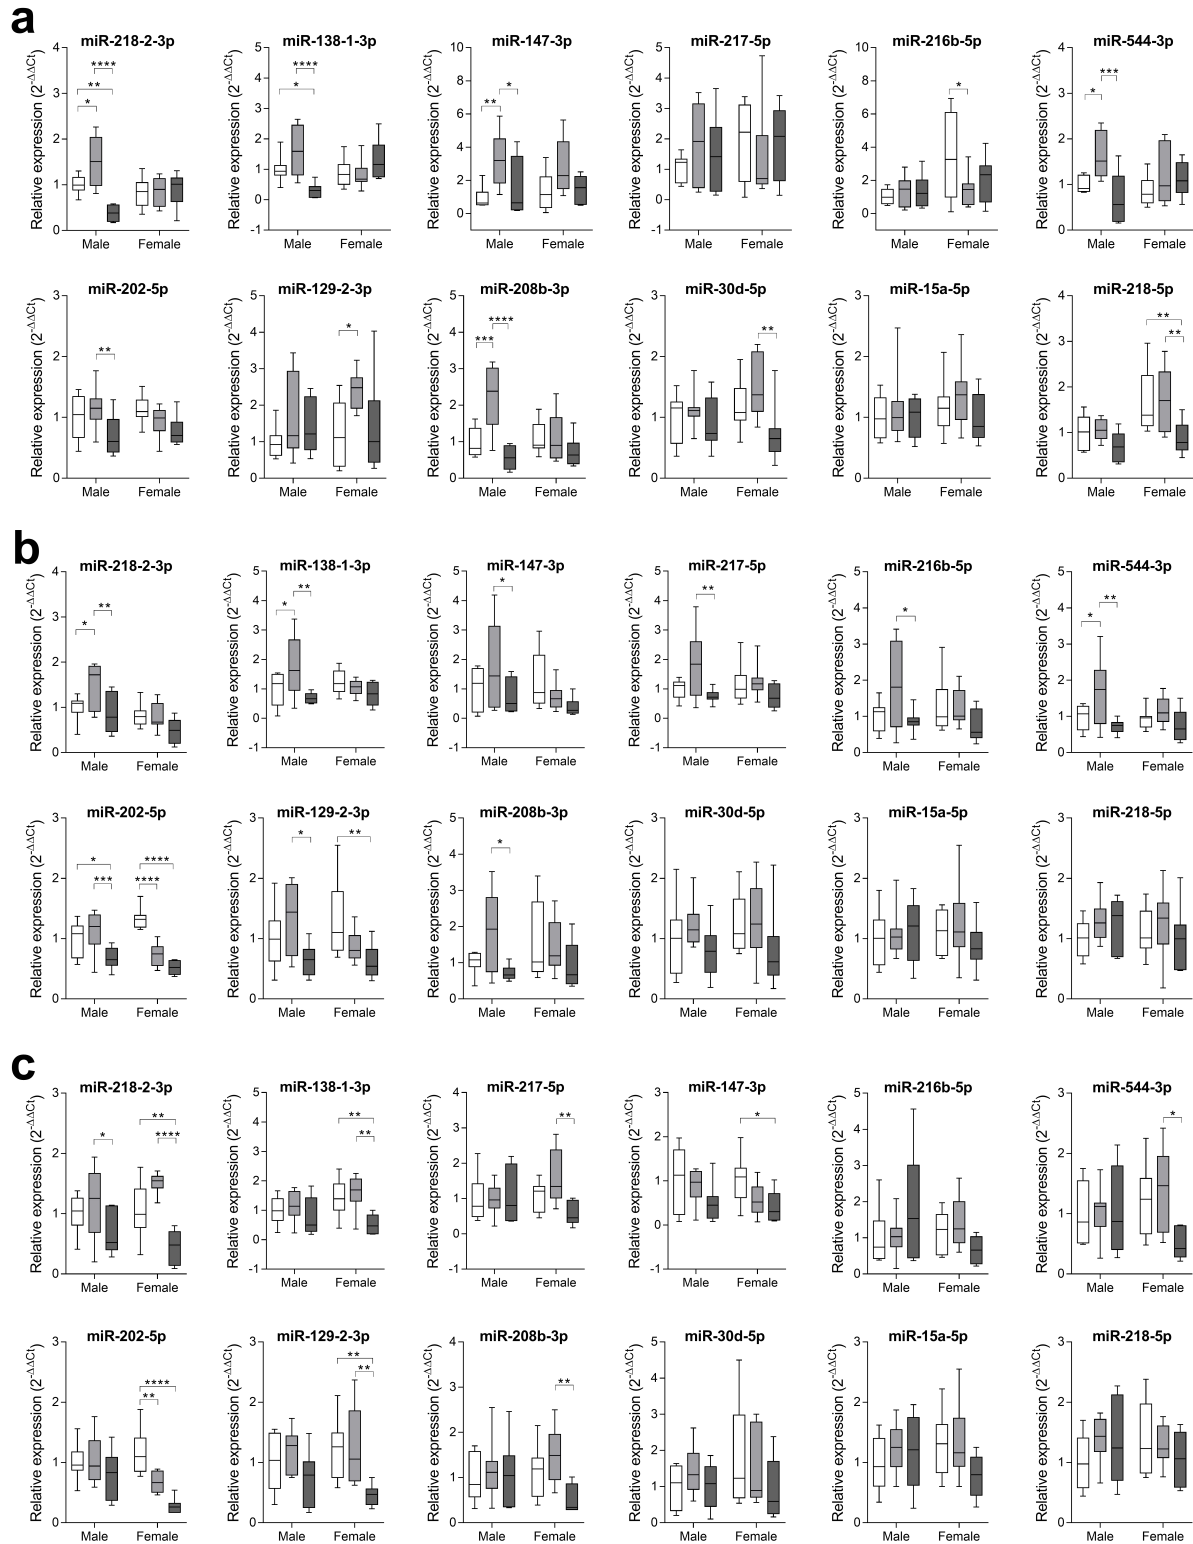

**Supplementary Figure 2.** Relative expression levels of selected miRNAs in different sections of the small intestine, duodenum (a), jejunum (b) and ileum (c), in response to an oral lipid challenge (250  $\mu$ L olive oil enriched with 40 mg of cholesterol) in male and female WT mice. Control (water, white bars), 2 hours after lipid challenge (grey bars) and 4 hours after lipid challenge (dark grey bars). Data are shown as mean  $\pm$  SD;  $n \geq 8$ . \* $p < 0.05$ , \*\* $p < 0.001$ , \*\*\* $p < 0.0001$ , compared with male control. Two-way ANOVA was followed by Bonferroni's post-hoc tests for multiple comparisons. \* $p < 0.05$ , \*\* $p < 0.01$ , \*\*\* $p < 0.001$ , \*\*\*\* $p < 0.0001$ .

**a**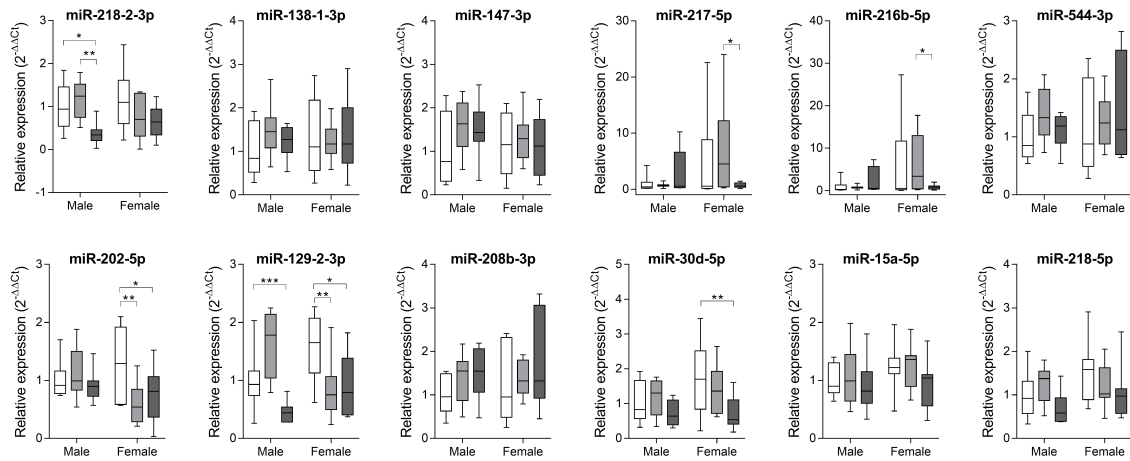**b**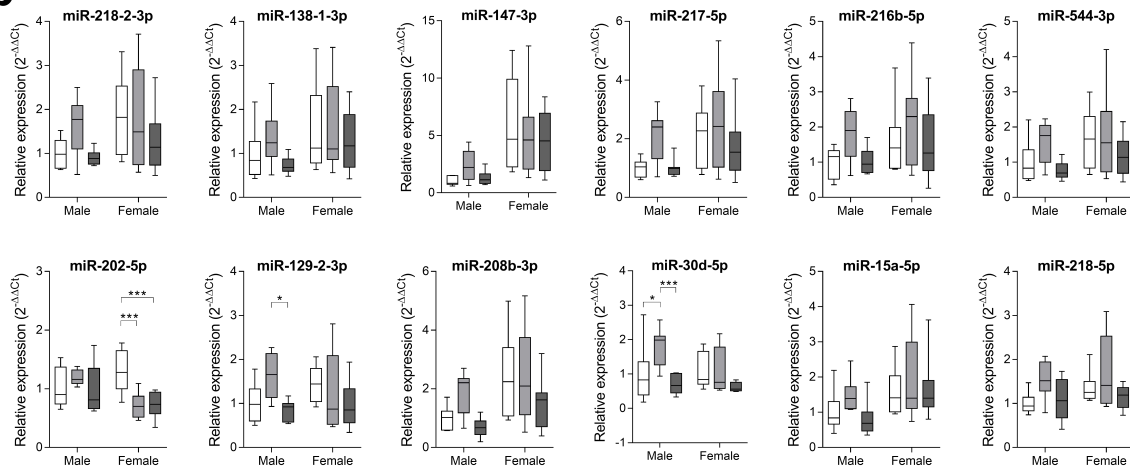

**Supplementary Figure 3.** Relative expression levels of selected miRNAs in colon (**a**) and liver (**b**) in response to an oral lipid challenge (250  $\mu$ L olive oil enriched with 40 mg of cholesterol) in male and female WT mice. Controls (water, white bars), 2 hours after lipid challenge (grey bars) and 4 hours after lipid challenge (dark grey bars). Data are shown as mean  $\pm$  SD;  $n \geq 8$ . Two-way ANOVA was followed by Bonferroni's post-hoc tests for multiple comparisons. \* $p < 0.05$ , \*\* $p < 0.01$ , \*\*\* $p < 0.001$ , \*\*\*\* $p < 0.0001$ .

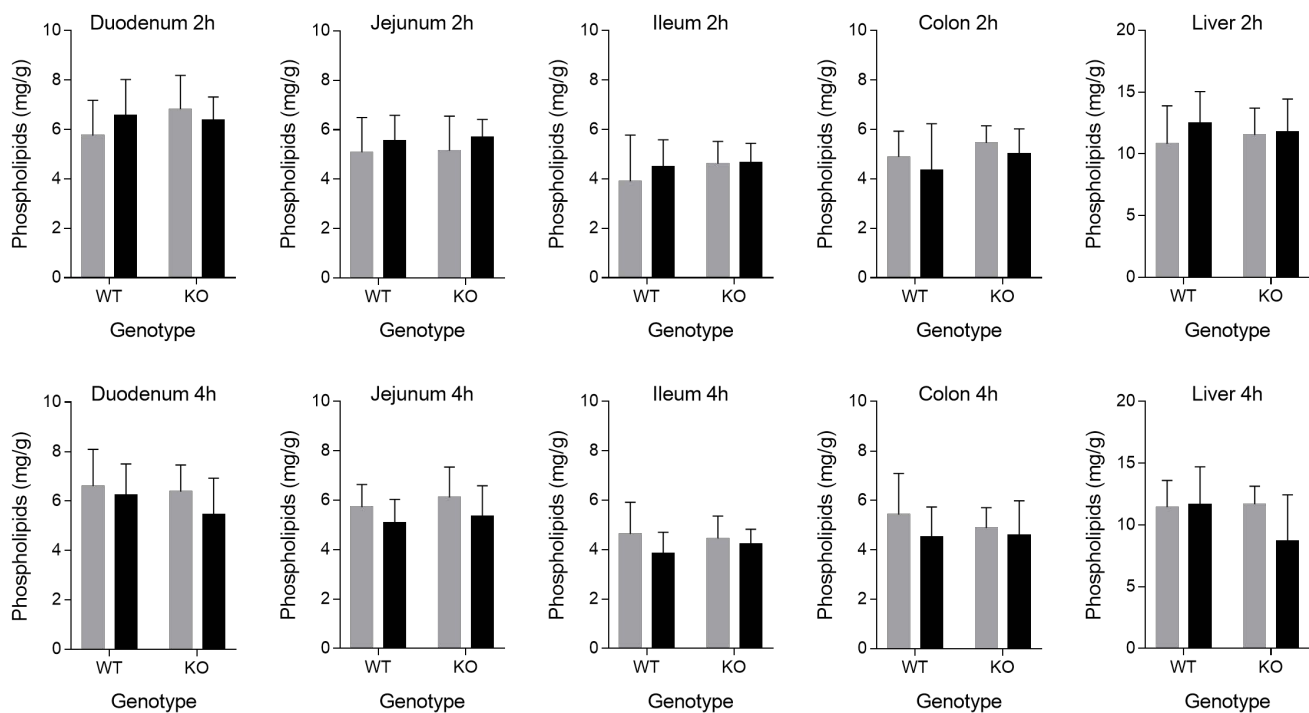

**Supplementary Figure 4.** Intestinal and hepatic phospholipids (mg/g) in WT (*Dicer1*<sup>loxP/loxP</sup>, *Vil-cre*(-)) and KO (*Dicer1*<sup>loxP/loxP</sup>, *Vil-cre*(+)) mice, 2 and 4 hours after an oral administration of cholesterol-enriched olive oil (black) or water (controls; grey);  $n \geq 9$ . Data are represented as mean  $\pm$  SD. Two-way ANOVA was followed by Bonferroni's post-hoc tests for multiple comparisons. \* $p < 0.05$ , \*\* $p < 0.01$ , \*\*\* $p < 0.001$ , \*\*\*\* $p < 0.0001$ .

**Supplementary Table 1.** Intestinal miRNAs altered in *acute* study. Found 2 h after an oral administration of cholesterol-enriched (40 mg) olive oil (250  $\mu$ L) in male C57BL/6 mice. <sup>a</sup> In bold, microRNAs with significant change, unpaired T-test,  $p < 0.05$ . <sup>b</sup> Pulse oleic vs. control. <sup>c</sup> Benjamini and Hochberg corrected values.

| miRNA <sup>a</sup>      | Fold Change <sup>b</sup> | P-value  | P (Benjamini-Hochberg) <sup>c</sup> |
|-------------------------|--------------------------|----------|-------------------------------------|
| <b>mmu-miR-1198-3p</b>  | -6.31                    | 6.01E-07 | 3.80E-04                            |
| <b>mmu-miR-146b-3p</b>  | 5.43                     | 9.17E-06 | 2.17E-03                            |
| <b>mmu-miR-344d-3p</b>  | 6.43                     | 1.04E-05 | 2.17E-03                            |
| <b>mmu-miR-295-3p</b>   | -4.30                    | 3.65E-05 | 5.72E-03                            |
| <b>mmu-miR-1953</b>     | -7.70                    | 6.05E-05 | 7.44E-03                            |
| <b>mmu-miR-202-5p</b>   | 3.66                     | 7.12E-05 | 7.44E-03                            |
| <b>mmu-miR-218-2-3p</b> | -12.77                   | 8.54E-05 | 7.65E-03                            |
| <b>mmu-miR-669k-3p</b>  | 3.09                     | 4.15E-04 | 2.97E-02                            |
| <b>mmu-miR-193b-5p</b>  | 6.01                     | 4.26E-04 | 2.97E-02                            |
| <b>mmu-miR-344c-3p</b>  | -2.63                    | 5.56E-04 | 3.49E-02                            |
| <b>mmu-miR-742-5p</b>   | -6.80                    | 9.35E-04 | 5.33E-02                            |
| <b>mmu-miR-669i</b>     | -2.62                    | 3.29E-03 | 1.52E-01                            |
| <b>mmu-miR-21a-3p</b>   | 1.87                     | 4.24E-03 | 1.66E-01                            |
| <b>mmu-miR-431-3p</b>   | -4.19                    | 6.66E-03 | 2.46E-01                            |
| <b>mmu-miR-669h-3p</b>  | -2.18                    | 8.38E-03 | 2.77E-01                            |
| <b>mmu-miR-1938</b>     | 3.92                     | 1.14E-02 | 3.40E-01                            |
| <b>mmu-miR-337-5p</b>   | 2.78                     | 1.29E-02 | 3.65E-01                            |
| <b>mmu-miR-711</b>      | 3.46                     | 1.34E-02 | 3.65E-01                            |
| <b>mmu-miR-208a-5p</b>  | 1.71                     | 1.62E-02 | 4.01E-01                            |
| <b>mmu-miR-495-3p</b>   | 1.39                     | 1.64E-02 | 4.01E-01                            |
| <b>mmu-miR-300-5p</b>   | 2.33                     | 1.66E-02 | 4.01E-01                            |
| <b>mmu-miR-291a-5p</b>  | 2.30                     | 1.77E-02 | 4.05E-01                            |
| <b>mmu-miR-216a-5p</b>  | -10.27                   | 1.83E-02 | 4.05E-01                            |
| <b>mmu-miR-217-5p</b>   | -11.16                   | 1.87E-02 | 4.05E-01                            |
| <b>mmu-miR-216b-5p</b>  | -11.10                   | 2.54E-02 | 5.18E-01                            |
| <b>mmu-miR-133a-5p</b>  | -2.54                    | 2.71E-02 | 5.32E-01                            |
| <b>mmu-miR-1929-5p</b>  | -2.89                    | 2.86E-02 | 5.44E-01                            |
| <b>mmu-miR-212-3p</b>   | 1.45                     | 3.02E-02 | 5.56E-01                            |
| <b>mmu-miR-449c-5p</b>  | 1.55                     | 3.51E-02 | 6.05E-01                            |
| <b>mmu-miR-879-3p</b>   | -3.42                    | 3.53E-02 | 6.05E-01                            |
| <b>mmu-miR-343</b>      | 2.48                     | 3.57E-02 | 6.05E-01                            |
| <b>mmu-miR-1894-5p</b>  | -2.24                    | 3.93E-02 | 6.15E-01                            |
| <b>mmu-miR-433-5p</b>   | -1.71                    | 4.13E-02 | 6.15E-01                            |
| <b>mmu-miR-671-3p</b>   | 2.77                     | 4.15E-02 | 6.15E-01                            |
| <b>mmu-miR-412-3p</b>   | 1.85                     | 4.19E-02 | 6.15E-01                            |
| <b>mmu-miR-129-2-3p</b> | -3.38                    | 4.38E-02 | 6.24E-01                            |
| <b>mmu-miR-770-5p</b>   | 3.07                     | 4.53E-02 | 6.31E-01                            |
| <b>mmu-miR-466h-5p</b>  | -2.53                    | 4.95E-02 | 6.75E-01                            |
| mmu-miR-672-5p          | 1.67                     | 5.32E-02 | 6.93E-01                            |
| mmu-miR-1193-5p         | 2.16                     | 5.50E-02 | 6.93E-01                            |
| mmu-miR-1951            | 1.71                     | 5.55E-02 | 6.93E-01                            |

|                   |       |          |          |
|-------------------|-------|----------|----------|
| mmu-miR-383-5p    | -2.57 | 5.56E-02 | 6.93E-01 |
| mmu-miR-1895      | 1.61  | 5.63E-02 | 6.93E-01 |
| mmu-miR-762       | 1.68  | 5.78E-02 | 6.97E-01 |
| mmu-miR-344b-3p   | -3.23 | 6.10E-02 | 7.15E-01 |
| mmu-miR-34c-3p    | -3.18 | 6.29E-02 | 7.15E-01 |
| mmu-miR-362-3p    | -1.34 | 6.39E-02 | 7.15E-01 |
| mmu-miR-323-3p    | 3.02  | 6.65E-02 | 7.15E-01 |
| mmu-miR-450a-2-3p | 2.14  | 6.67E-02 | 7.15E-01 |
| mmu-miR-296-3p    | -1.54 | 6.73E-02 | 7.15E-01 |
| mmu-miR-183-3p    | 1.36  | 7.22E-02 | 7.43E-01 |
| mmu-miR-742-3p    | 2.53  | 7.23E-02 | 7.43E-01 |
| mmu-miR-1981-5p   | -1.86 | 7.60E-02 | 7.48E-01 |
| mmu-miR-92b-3p    | 2.13  | 7.88E-02 | 7.48E-01 |
| mmu-miR-1947-5p   | 3.71  | 7.93E-02 | 7.48E-01 |
| mmu-miR-448-3p    | -1.64 | 8.01E-02 | 7.48E-01 |
| mmu-miR-1247-5p   | -2.01 | 8.12E-02 | 7.48E-01 |
| mmu-miR-294-5p    | 2.10  | 8.27E-02 | 7.48E-01 |
| mmu-miR-698-3p    | -1.53 | 8.39E-02 | 7.48E-01 |
| mmu-miR-452-5p    | -1.93 | 8.47E-02 | 7.48E-01 |
| mmu-miR-487b-3p   | 1.35  | 9.07E-02 | 7.83E-01 |
| mmu-miR-615-3p    | 1.73  | 9.33E-02 | 7.83E-01 |
| mmu-miR-298-5p    | 1.71  | 9.42E-02 | 7.83E-01 |
| mmu-miR-761       | -1.74 | 9.47E-02 | 7.83E-01 |
| mmu-miR-1955-5p   | -2.38 | 9.50E-02 | 7.83E-01 |
| mmu-miR-615-5p    | 1.85  | 9.76E-02 | 7.86E-01 |
| mmu-miR-1966-5p   | 3.00  | 1.06E-01 | 8.21E-01 |
| mmu-miR-1948-3p   | -2.63 | 1.06E-01 | 8.21E-01 |
| mmu-miR-32-5p     | -1.29 | 1.07E-01 | 8.21E-01 |
| mmu-miR-18b-5p    | -1.85 | 1.10E-01 | 8.28E-01 |
| mmu-miR-465b-5p   | 2.29  | 1.14E-01 | 8.52E-01 |
| mmu-miR-29c-5p    | -1.38 | 1.16E-01 | 8.52E-01 |
| mmu-miR-384-3p    | -2.44 | 1.18E-01 | 8.52E-01 |
| mmu-miR-122-5p    | -1.65 | 1.19E-01 | 8.52E-01 |
| mmu-let-7a-2-3p   | -3.10 | 1.20E-01 | 8.52E-01 |
| mmu-miR-1967      | -1.80 | 1.23E-01 | 8.52E-01 |
| mmu-miR-203-5p    | -1.32 | 1.25E-01 | 8.52E-01 |
| mmu-miR-1902      | 1.96  | 1.25E-01 | 8.52E-01 |
| mmu-miR-501-5p    | -1.51 | 1.26E-01 | 8.52E-01 |
| mmu-miR-1927      | -2.11 | 1.26E-01 | 8.52E-01 |
| mmu-miR-542-3p    | -1.64 | 1.32E-01 | 8.78E-01 |
| mmu-miR-297a-3p   | 2.10  | 1.37E-01 | 8.96E-01 |
| mmu-miR-10a-3p    | -1.57 | 1.41E-01 | 9.00E-01 |

|                 |       |          |          |
|-----------------|-------|----------|----------|
| mmu-miR-504-5p  | 2.09  | 1.46E-01 | 9.27E-01 |
| mmu-miR-23a-5p  | -2.22 | 1.49E-01 | 9.37E-01 |
| mmu-miR-744-5p  | 1.28  | 1.52E-01 | 9.43E-01 |
| mmu-miR-376a-3p | -1.50 | 1.70E-01 | 9.73E-01 |
| mmu-miR-673-5p  | -3.19 | 1.74E-01 | 9.73E-01 |
| mmu-miR-1186a   | -3.25 | 1.74E-01 | 9.73E-01 |
| mmu-miR-804     | -2.21 | 1.76E-01 | 9.73E-01 |
| mmu-miR-409-3p  | 1.65  | 1.77E-01 | 9.73E-01 |
| mmu-miR-101a-5p | -1.46 | 1.79E-01 | 9.73E-01 |
| mmu-miR-700-3p  | 1.93  | 1.79E-01 | 9.73E-01 |
| mmu-miR-483-3p  | 1.61  | 1.79E-01 | 9.73E-01 |
| mmu-miR-692     | -1.65 | 1.80E-01 | 9.73E-01 |
| mmu-miR-34c-5p  | 1.20  | 1.85E-01 | 9.73E-01 |
| mmu-miR-369-3p  | 1.29  | 1.87E-01 | 9.73E-01 |
| mmu-miR-1907    | 1.57  | 1.96E-01 | 9.73E-01 |
| mmu-miR-17-5p   | 1.23  | 1.98E-01 | 9.73E-01 |
| mmu-miR-532-3p  | -1.39 | 2.01E-01 | 9.73E-01 |
| mmu-miR-874-3p  | 1.37  | 2.01E-01 | 9.73E-01 |
| mmu-miR-500-3p  | -1.30 | 2.05E-01 | 9.73E-01 |
| mmu-miR-687     | -1.33 | 2.07E-01 | 9.73E-01 |
| mmu-miR-669d-5p | -1.55 | 2.08E-01 | 9.73E-01 |
| mmu-miR-433-3p  | 2.08  | 2.10E-01 | 9.73E-01 |
| mmu-miR-484     | 1.20  | 2.11E-01 | 9.73E-01 |
| mmu-miR-329-3p  | -1.46 | 2.11E-01 | 9.73E-01 |
| mmu-miR-7b-5p   | 1.19  | 2.12E-01 | 9.73E-01 |
| mmu-miR-670-5p  | -1.75 | 2.12E-01 | 9.73E-01 |
| mmu-miR-654-3p  | 1.51  | 2.13E-01 | 9.73E-01 |
| mmu-miR-873a-5p | -3.16 | 2.15E-01 | 9.73E-01 |
| mmu-miR-1195    | 1.38  | 2.16E-01 | 9.73E-01 |
| mmu-miR-574-3p  | 1.41  | 2.16E-01 | 9.73E-01 |
| mmu-miR-30d-3p  | -1.32 | 2.26E-01 | 9.87E-01 |
| mmu-miR-139-3p  | 2.00  | 2.27E-01 | 9.87E-01 |
| mmu-miR-2137    | 1.40  | 2.28E-01 | 9.87E-01 |
| mmu-miR-1946b   | -1.64 | 2.30E-01 | 9.87E-01 |
| mmu-miR-669n    | -1.60 | 2.32E-01 | 9.87E-01 |
| mmu-miR-669j    | -1.38 | 2.34E-01 | 9.87E-01 |
| mmu-miR-434-5p  | 1.24  | 2.38E-01 | 9.87E-01 |
| mmu-miR-147-3p  | 1.28  | 2.48E-01 | 9.87E-01 |
| mmu-miR-875-5p  | 1.63  | 2.48E-01 | 9.87E-01 |
| mmu-miR-335-3p  | -1.19 | 2.49E-01 | 9.87E-01 |
| mmu-miR-496a-3p | -1.59 | 2.49E-01 | 9.87E-01 |
| mmu-miR-466j    | -2.07 | 2.49E-01 | 9.87E-01 |
| mmu-miR-466k    | -1.71 | 2.53E-01 | 9.87E-01 |
| mmu-miR-431-5p  | 1.24  | 2.55E-01 | 9.87E-01 |
| mmu-miR-466b-5p | -2.09 | 2.55E-01 | 9.87E-01 |
| mmu-miR-384-5p  | 1.40  | 2.55E-01 | 9.87E-01 |

|                   |       |          |          |
|-------------------|-------|----------|----------|
| mmu-miR-872-3p    | -1.20 | 2.57E-01 | 9.87E-01 |
| mmu-miR-193a-5p   | -1.71 | 2.59E-01 | 9.87E-01 |
| mmu-miR-1982.1-3p | -7.95 | 2.66E-01 | 9.87E-01 |
| mmu-miR-369-5p    | 1.64  | 2.67E-01 | 9.87E-01 |
| mmu-miR-211-5p    | -1.73 | 2.70E-01 | 9.87E-01 |
| mmu-miR-291b-5p   | 1.47  | 2.72E-01 | 9.87E-01 |
| mmu-miR-210-3p    | 1.59  | 2.74E-01 | 9.87E-01 |
| mmu-miR-490-5p    | -1.26 | 2.74E-01 | 9.87E-01 |
| mmu-miR-539-5p    | -2.08 | 2.75E-01 | 9.87E-01 |
| mmu-miR-27a-3p    | 1.14  | 2.77E-01 | 9.87E-01 |
| mmu-miR-1905      | 1.24  | 2.78E-01 | 9.87E-01 |
| mmu-miR-137-3p    | 1.11  | 2.80E-01 | 9.87E-01 |
| mmu-miR-743a-3p   | -1.50 | 2.83E-01 | 9.87E-01 |
| mmu-miR-130a-3p   | 1.16  | 2.83E-01 | 9.87E-01 |
| mmu-miR-26a-5p    | 1.24  | 2.85E-01 | 9.87E-01 |
| mmu-miR-1940      | 1.47  | 2.85E-01 | 9.87E-01 |
| mmu-miR-106a-5p   | 1.20  | 2.91E-01 | 9.87E-01 |
| mmu-miR-1196-5p   | 1.68  | 2.93E-01 | 9.87E-01 |
| mmu-miR-30a-3p    | -1.16 | 2.96E-01 | 9.87E-01 |
| mmu-miR-129-1-3p  | -2.31 | 2.97E-01 | 9.87E-01 |
| mmu-miR-681       | -1.46 | 2.98E-01 | 9.87E-01 |
| mmu-miR-467f      | 1.50  | 3.02E-01 | 9.87E-01 |
| mmu-miR-320-3p    | 1.25  | 3.11E-01 | 9.87E-01 |
| mmu-miR-708-3p    | 1.67  | 3.17E-01 | 9.87E-01 |
| mmu-miR-704       | 1.93  | 3.23E-01 | 9.87E-01 |
| mmu-miR-1b-5p     | 1.89  | 3.27E-01 | 9.87E-01 |
| mmu-miR-208b-3p   | -1.53 | 3.27E-01 | 9.87E-01 |
| mmu-miR-191-3p    | -1.28 | 3.28E-01 | 9.87E-01 |
| mmu-miR-676-3p    | -1.25 | 3.33E-01 | 9.87E-01 |
| mmu-miR-802-5p    | -1.17 | 3.34E-01 | 9.87E-01 |
| mmu-miR-467e-5p   | -1.19 | 3.38E-01 | 9.87E-01 |
| mmu-miR-449a-5p   | 1.35  | 3.39E-01 | 9.87E-01 |
| mmu-miR-598-3p    | -1.43 | 3.41E-01 | 9.87E-01 |
| mmu-miR-1191      | -1.35 | 3.46E-01 | 9.87E-01 |
| mmu-miR-410-3p    | 1.27  | 3.60E-01 | 9.87E-01 |
| mmu-miR-30d-5p    | -1.16 | 3.60E-01 | 9.87E-01 |
| mmu-miR-501-3p    | -1.20 | 3.64E-01 | 9.87E-01 |
| mmu-miR-224-5p    | 1.34  | 3.68E-01 | 9.87E-01 |
| mmu-miR-466d-5p   | -2.25 | 3.72E-01 | 9.87E-01 |
| mmu-miR-28a-3p    | -1.28 | 3.77E-01 | 9.87E-01 |
| mmu-miR-551b-3p   | 1.57  | 3.79E-01 | 9.87E-01 |
| mmu-miR-132-3p    | 1.20  | 3.87E-01 | 9.87E-01 |
| mmu-miR-872-5p    | -1.22 | 3.87E-01 | 9.87E-01 |
| mmu-miR-544-3p    | -1.64 | 3.88E-01 | 9.87E-01 |
| mmu-miR-677-5p    | -1.38 | 3.88E-01 | 9.87E-01 |
| mmu-miR-374b-5p   | 1.14  | 3.88E-01 | 9.87E-01 |

|                  |       |          |          |
|------------------|-------|----------|----------|
| mmu-miR-340-5p   | -1.22 | 3.88E-01 | 9.87E-01 |
| mmu-miR-30e-3p   | -1.19 | 3.89E-01 | 9.87E-01 |
| mmu-miR-30c-1-3p | -1.32 | 3.92E-01 | 9.87E-01 |
| mmu-miR-26b-5p   | 1.11  | 3.96E-01 | 9.87E-01 |
| mmu-miR-409-5p   | 1.34  | 3.96E-01 | 9.87E-01 |
| mmu-miR-466d-3p  | 1.72  | 3.97E-01 | 9.87E-01 |
| mmu-miR-135b-5p  | 1.34  | 3.97E-01 | 9.87E-01 |
| mmu-miR-297c-5p  | -1.49 | 3.99E-01 | 9.87E-01 |
| mmu-miR-29a-5p   | -1.18 | 4.03E-01 | 9.87E-01 |
| mmu-miR-1935     | 1.73  | 4.03E-01 | 9.87E-01 |
| mmu-let-7b-5p    | 1.18  | 4.04E-01 | 9.87E-01 |
| mmu-miR-10b-5p   | 1.13  | 4.10E-01 | 9.87E-01 |
| mmu-miR-325-5p   | -1.55 | 4.11E-01 | 9.87E-01 |
| mmu-miR-1198-5p  | -1.26 | 4.12E-01 | 9.87E-01 |
| mmu-miR-337-3p   | -1.34 | 4.25E-01 | 9.87E-01 |
| mmu-miR-743b-5p  | 1.40  | 4.25E-01 | 9.87E-01 |
| mmu-miR-450b-5p  | -1.77 | 4.31E-01 | 9.87E-01 |
| mmu-miR-331-5p   | -1.65 | 4.32E-01 | 9.87E-01 |
| mmu-miR-546      | -1.41 | 4.33E-01 | 9.87E-01 |
| mmu-miR-148a-3p  | -1.24 | 4.33E-01 | 9.87E-01 |
| mmu-miR-153-3p   | -1.20 | 4.35E-01 | 9.87E-01 |
| mmu-miR-713      | 1.15  | 4.35E-01 | 9.87E-01 |
| mmu-miR-196a-5p  | 1.81  | 4.37E-01 | 9.87E-01 |
| mmu-miR-668-3p   | -1.27 | 4.38E-01 | 9.87E-01 |
| mmu-miR-2183     | -1.30 | 4.38E-01 | 9.87E-01 |
| mmu-miR-346-5p   | -1.63 | 4.38E-01 | 9.87E-01 |
| mmu-miR-1930-5p  | -1.35 | 4.41E-01 | 9.87E-01 |
| mmu-miR-15b-3p   | -1.20 | 4.44E-01 | 9.87E-01 |
| mmu-miR-503-3p   | 1.15  | 4.46E-01 | 9.87E-01 |
| mmu-let-7e-3p    | -1.29 | 4.47E-01 | 9.87E-01 |
| mmu-miR-196b-3p  | -1.32 | 4.48E-01 | 9.87E-01 |
| mmu-miR-297b-5p  | 1.46  | 4.51E-01 | 9.87E-01 |
| mmu-miR-1957a    | 1.32  | 4.52E-01 | 9.87E-01 |
| mmu-miR-138-1-3p | -1.47 | 4.52E-01 | 9.87E-01 |
| mmu-miR-99b-3p   | -1.35 | 4.54E-01 | 9.87E-01 |
| mmu-miR-758-3p   | 1.41  | 4.56E-01 | 9.87E-01 |
| mmu-miR-328-3p   | 1.33  | 4.57E-01 | 9.87E-01 |
| mmu-let-7c-5p    | 1.12  | 4.62E-01 | 9.87E-01 |
| mmu-let-7b-3p    | 1.33  | 4.63E-01 | 9.87E-01 |
| mmu-miR-376b-5p  | -1.27 | 4.66E-01 | 9.87E-01 |
| mmu-miR-376c-5p  | 1.50  | 4.68E-01 | 9.87E-01 |
| mmu-miR-130b-3p  | 1.09  | 4.71E-01 | 9.87E-01 |
| mmu-miR-10a-5p   | 1.11  | 4.72E-01 | 9.87E-01 |
| mmu-miR-330-3p   | -1.36 | 4.75E-01 | 9.87E-01 |
| mmu-miR-465a-5p  | 1.22  | 4.77E-01 | 9.87E-01 |
| mmu-miR-694      | 1.30  | 4.80E-01 | 9.87E-01 |

|                  |       |          |          |
|------------------|-------|----------|----------|
| mmu-miR-18a-3p   | 1.15  | 4.80E-01 | 9.87E-01 |
| mmu-miR-361-5p   | 1.57  | 4.81E-01 | 9.87E-01 |
| mmu-miR-411-3p   | 1.26  | 4.81E-01 | 9.87E-01 |
| mmu-miR-33-3p    | -1.23 | 4.82E-01 | 9.87E-01 |
| mmu-miR-106b-3p  | -1.23 | 4.83E-01 | 9.87E-01 |
| mmu-miR-362-5p   | -1.15 | 4.86E-01 | 9.87E-01 |
| mmu-miR-425-3p   | -1.21 | 4.87E-01 | 9.87E-01 |
| mmu-miR-1a-3p    | 1.12  | 4.90E-01 | 9.87E-01 |
| mmu-miR-195a-5p  | 1.13  | 4.91E-01 | 9.87E-01 |
| mmu-miR-93-3p    | -1.21 | 4.92E-01 | 9.87E-01 |
| mmu-miR-98-5p    | 1.12  | 4.93E-01 | 9.87E-01 |
| mmu-miR-540-3p   | -1.27 | 4.93E-01 | 9.87E-01 |
| mmu-miR-342-5p   | -1.22 | 4.95E-01 | 9.87E-01 |
| mmu-miR-34b-5p   | -1.11 | 4.96E-01 | 9.87E-01 |
| mmu-miR-201-5p   | 1.66  | 4.97E-01 | 9.87E-01 |
| mmu-miR-103-2-5p | -1.18 | 4.98E-01 | 9.87E-01 |
| mmu-miR-301a-3p  | 1.16  | 5.00E-01 | 9.87E-01 |
| mmu-miR-188-5p   | -1.14 | 5.05E-01 | 9.87E-01 |
| mmu-miR-425-5p   | 1.11  | 5.05E-01 | 9.87E-01 |
| mmu-miR-466f-5p  | -1.38 | 5.06E-01 | 9.87E-01 |
| mmu-miR-1900     | -1.29 | 5.08E-01 | 9.87E-01 |
| mmu-miR-154-3p   | 1.54  | 5.08E-01 | 9.87E-01 |
| mmu-miR-1903     | -1.28 | 5.10E-01 | 9.87E-01 |
| mmu-miR-1897-5p  | -1.36 | 5.13E-01 | 9.87E-01 |
| mmu-miR-511-5p   | -1.57 | 5.13E-01 | 9.87E-01 |
| mmu-miR-24-3p    | 1.13  | 5.14E-01 | 9.87E-01 |
| mmu-miR-146a-5p  | 1.11  | 5.14E-01 | 9.87E-01 |
| mmu-let-7i-5p    | 1.14  | 5.14E-01 | 9.87E-01 |
| mmu-miR-212-5p   | -1.25 | 5.15E-01 | 9.87E-01 |
| mmu-miR-494-3p   | 1.20  | 5.15E-01 | 9.87E-01 |
| mmu-miR-468-3p   | 1.39  | 5.15E-01 | 9.87E-01 |
| mmu-miR-1839-5p  | -1.14 | 5.17E-01 | 9.87E-01 |
| mmu-miR-16-1-3p  | -1.25 | 5.18E-01 | 9.87E-01 |
| mmu-miR-467c-5p  | 1.19  | 5.21E-01 | 9.87E-01 |
| mmu-miR-34b-3p   | 1.25  | 5.23E-01 | 9.87E-01 |
| mmu-miR-200b-3p  | 1.12  | 5.27E-01 | 9.87E-01 |
| mmu-miR-377-3p   | 1.11  | 5.31E-01 | 9.87E-01 |
| mmu-miR-206-3p   | -1.63 | 5.34E-01 | 9.87E-01 |
| mmu-miR-15b-5p   | 1.09  | 5.38E-01 | 9.87E-01 |
| mmu-miR-144-3p   | -1.18 | 5.39E-01 | 9.87E-01 |
| mmu-let-7d-5p    | 1.13  | 5.39E-01 | 9.87E-01 |
| mmu-let-7a-5p    | 1.11  | 5.42E-01 | 9.87E-01 |
| mmu-miR-29b-3p   | -1.11 | 5.44E-01 | 9.87E-01 |
| mmu-miR-151-5p   | 1.11  | 5.45E-01 | 9.87E-01 |
| mmu-let-7d-3p    | 1.40  | 5.47E-01 | 9.87E-01 |
| mmu-miR-26a-1-3p | -1.24 | 5.48E-01 | 9.87E-01 |



|                   |       |          |          |
|-------------------|-------|----------|----------|
| mmu-miR-467h      | -1.27 | 5.48E-01 | 9.87E-01 |
| mmu-miR-26b-3p    | -1.13 | 5.48E-01 | 9.87E-01 |
| mmu-miR-467b-3p   | -1.51 | 5.48E-01 | 9.87E-01 |
| mmu-miR-126-5p    | -1.14 | 5.48E-01 | 9.87E-01 |
| mmu-miR-1964-3p   | -1.48 | 5.49E-01 | 9.87E-01 |
| mmu-miR-125b-2-3p | -1.24 | 5.50E-01 | 9.87E-01 |
| mmu-miR-27a-5p    | -1.27 | 5.50E-01 | 9.87E-01 |
| mmu-miR-1932      | -1.21 | 5.51E-01 | 9.87E-01 |
| mmu-let-7f-1-3p   | -1.18 | 5.52E-01 | 9.87E-01 |
| mmu-miR-1952      | 1.36  | 5.53E-01 | 9.87E-01 |
| mmu-miR-674-3p    | -1.16 | 5.55E-01 | 9.87E-01 |
| mmu-miR-192-3p    | -1.15 | 5.55E-01 | 9.87E-01 |
| mmu-miR-221-3p    | 1.10  | 5.55E-01 | 9.87E-01 |
| mmu-miR-465c-5p   | -1.33 | 5.55E-01 | 9.87E-01 |
| mmu-miR-148b-3p   | 1.09  | 5.62E-01 | 9.87E-01 |
| mmu-miR-297a-5p   | -1.19 | 5.63E-01 | 9.87E-01 |
| mmu-miR-466f      | 1.36  | 5.64E-01 | 9.87E-01 |
| mmu-let-7g-3p     | -1.13 | 5.65E-01 | 9.87E-01 |
| mmu-miR-1941-3p   | -1.12 | 5.66E-01 | 9.87E-01 |
| mmu-miR-669e-5p   | -1.46 | 5.66E-01 | 9.87E-01 |
| mmu-miR-127-5p    | -1.17 | 5.66E-01 | 9.87E-01 |
| mmu-miR-871-5p    | 1.11  | 5.68E-01 | 9.87E-01 |
| mmu-miR-327       | -1.16 | 5.68E-01 | 9.87E-01 |
| mmu-miR-709       | 1.15  | 5.69E-01 | 9.87E-01 |
| mmu-miR-21a-5p    | 1.10  | 5.70E-01 | 9.87E-01 |
| mmu-miR-125a-3p   | 1.38  | 5.70E-01 | 9.87E-01 |
| mmu-miR-22-3p     | 1.09  | 5.72E-01 | 9.87E-01 |
| mmu-miR-27b-5p    | -1.25 | 5.75E-01 | 9.87E-01 |
| mmu-let-7c-1-3p   | 1.29  | 5.78E-01 | 9.87E-01 |
| mmu-miR-1894-3p   | -1.37 | 5.81E-01 | 9.87E-01 |
| mmu-miR-125b-1-3p | 1.44  | 5.82E-01 | 9.87E-01 |
| mmu-miR-214-5p    | -1.13 | 5.85E-01 | 9.87E-01 |
| mmu-miR-199a-3p   | 1.11  | 5.87E-01 | 9.87E-01 |
| mmu-miR-199b-5p   | -1.13 | 5.88E-01 | 9.87E-01 |
| mmu-miR-25-3p     | 1.09  | 5.89E-01 | 9.87E-01 |
| mmu-miR-532-5p    | -1.14 | 5.92E-01 | 9.87E-01 |
| mmu-let-7i-3p     | -1.17 | 5.93E-01 | 9.87E-01 |
| mmu-miR-196b-5p   | -1.36 | 5.94E-01 | 9.87E-01 |
| mmu-miR-136-5p    | -1.12 | 5.99E-01 | 9.87E-01 |
| mmu-miR-351-5p    | 1.17  | 6.00E-01 | 9.87E-01 |
| mmu-miR-423-5p    | 1.13  | 6.03E-01 | 9.87E-01 |
| mmu-miR-145a-3p   | -1.13 | 6.04E-01 | 9.87E-01 |
| mmu-miR-378a-5p   | -1.14 | 6.04E-01 | 9.87E-01 |
| mmu-miR-202-3p    | 1.52  | 6.08E-01 | 9.87E-01 |
| mmu-miR-667-3p    | -1.33 | 6.08E-01 | 9.87E-01 |
| mmu-let-7f-2-3p   | -1.14 | 6.10E-01 | 9.87E-01 |

|                  |       |          |          |
|------------------|-------|----------|----------|
| mmu-miR-181d-5p  | 1.10  | 6.14E-01 | 9.87E-01 |
| mmu-miR-1949     | -1.14 | 6.15E-01 | 9.87E-01 |
| mmu-miR-434-3p   | -1.13 | 6.17E-01 | 9.87E-01 |
| mmu-miR-126-3p   | 1.09  | 6.18E-01 | 9.87E-01 |
| mmu-miR-18a-5p   | 1.09  | 6.20E-01 | 9.87E-01 |
| mmu-miR-340-3p   | -1.14 | 6.22E-01 | 9.87E-01 |
| mmu-miR-142-3p   | -1.09 | 6.22E-01 | 9.87E-01 |
| mmu-miR-455-5p   | 1.10  | 6.25E-01 | 9.87E-01 |
| mmu-miR-134-5p   | -1.29 | 6.30E-01 | 9.87E-01 |
| mmu-miR-33-5p    | -1.09 | 6.32E-01 | 9.87E-01 |
| mmu-miR-423-3p   | 1.10  | 6.34E-01 | 9.87E-01 |
| mmu-miR-130b-5p  | -1.15 | 6.34E-01 | 9.87E-01 |
| mmu-miR-652-3p   | 1.11  | 6.35E-01 | 9.87E-01 |
| mmu-miR-708-5p   | -1.09 | 6.36E-01 | 9.87E-01 |
| mmu-miR-710      | 1.19  | 6.41E-01 | 9.87E-01 |
| mmu-miR-669l-5p  | -1.23 | 6.42E-01 | 9.87E-01 |
| mmu-miR-335-5p   | 1.12  | 6.43E-01 | 9.87E-01 |
| mmu-miR-187-3p   | -1.15 | 6.45E-01 | 9.87E-01 |
| mmu-miR-186-5p   | 1.07  | 6.50E-01 | 9.87E-01 |
| mmu-miR-339-3p   | -1.15 | 6.52E-01 | 9.87E-01 |
| mmu-miR-466f-3p  | -1.18 | 6.53E-01 | 9.87E-01 |
| mmu-miR-15a-3p   | -1.14 | 6.57E-01 | 9.87E-01 |
| mmu-miR-129-5p   | 1.24  | 6.60E-01 | 9.87E-01 |
| mmu-miR-674-5p   | -1.09 | 6.61E-01 | 9.87E-01 |
| mmu-miR-764-5p   | 1.18  | 6.63E-01 | 9.87E-01 |
| mmu-miR-146b-5p  | 1.06  | 6.65E-01 | 9.87E-01 |
| mmu-miR-1249-3p  | -1.13 | 6.66E-01 | 9.87E-01 |
| mmu-miR-744-3p   | -1.12 | 6.67E-01 | 9.87E-01 |
| mmu-miR-429-3p   | 1.07  | 6.68E-01 | 9.87E-01 |
| mmu-miR-99b-5p   | -1.09 | 6.68E-01 | 9.87E-01 |
| mmu-miR-10b-3p   | -1.38 | 6.72E-01 | 9.87E-01 |
| mmu-miR-1934-5p  | -1.33 | 6.72E-01 | 9.87E-01 |
| mmu-miR-135a-5p  | 1.07  | 6.72E-01 | 9.87E-01 |
| mmu-miR-205-5p   | -1.15 | 6.74E-01 | 9.87E-01 |
| mmu-miR-338-3p   | -1.11 | 6.75E-01 | 9.87E-01 |
| mmu-miR-124-3p   | -1.09 | 6.77E-01 | 9.87E-01 |
| mmu-miR-455-3p   | 1.08  | 6.77E-01 | 9.87E-01 |
| mmu-miR-706      | 1.12  | 6.79E-01 | 9.87E-01 |
| mmu-miR-194-2-3p | -1.13 | 6.82E-01 | 9.87E-01 |
| mmu-miR-141-5p   | -1.11 | 6.82E-01 | 9.87E-01 |
| mmu-miR-541-5p   | 1.13  | 6.82E-01 | 9.87E-01 |
| mmu-miR-194-5p   | -1.06 | 6.83E-01 | 9.87E-01 |
| mmu-miR-1956     | 1.31  | 6.86E-01 | 9.87E-01 |
| mmu-miR-182-5p   | 1.09  | 6.87E-01 | 9.87E-01 |
| mmu-miR-293-3p   | 1.23  | 6.88E-01 | 9.87E-01 |
| mmu-miR-31-5p    | -1.08 | 6.88E-01 | 9.87E-01 |

|                   |       |          |          |
|-------------------|-------|----------|----------|
| mmu-miR-190a-5p   | -1.08 | 6.89E-01 | 9.87E-01 |
| mmu-miR-223-3p    | 1.07  | 6.92E-01 | 9.87E-01 |
| mmu-miR-96-5p     | -1.08 | 6.94E-01 | 9.87E-01 |
| mmu-miR-325-3p    | -1.25 | 6.98E-01 | 9.87E-01 |
| mmu-miR-467b-5p   | -1.07 | 6.98E-01 | 9.87E-01 |
| mmu-miR-543-3p    | -1.13 | 7.01E-01 | 9.87E-01 |
| mmu-miR-324-3p    | 1.07  | 7.01E-01 | 9.87E-01 |
| mmu-miR-138-5p    | 1.03  | 7.05E-01 | 9.87E-01 |
| mmu-miR-450a-5p   | 1.10  | 7.06E-01 | 9.87E-01 |
| mmu-miR-379-3p    | 1.08  | 7.07E-01 | 9.87E-01 |
| mmu-miR-155-5p    | 1.10  | 7.07E-01 | 9.87E-01 |
| mmu-miR-497-5p    | 1.06  | 7.09E-01 | 9.87E-01 |
| mmu-miR-183-5p    | 1.06  | 7.10E-01 | 9.87E-01 |
| mmu-miR-490-3p    | -1.10 | 7.11E-01 | 9.87E-01 |
| mmu-miR-150-5p    | -1.11 | 7.11E-01 | 9.87E-01 |
| mmu-miR-214-3p    | -1.08 | 7.15E-01 | 9.87E-01 |
| mmu-miR-486-3p    | 1.24  | 7.18E-01 | 9.87E-01 |
| mmu-miR-20b-5p    | 1.09  | 7.20E-01 | 9.87E-01 |
| mmu-miR-219-1-3p  | -1.25 | 7.24E-01 | 9.87E-01 |
| mmu-miR-148a-5p   | -1.14 | 7.26E-01 | 9.87E-01 |
| mmu-miR-7a-1-3p   | -1.08 | 7.27E-01 | 9.87E-01 |
| mmu-miR-105       | 1.25  | 7.30E-01 | 9.87E-01 |
| mmu-miR-382-5p    | 1.07  | 7.33E-01 | 9.87E-01 |
| mmu-miR-16-5p     | 1.06  | 7.34E-01 | 9.87E-01 |
| mmu-miR-345-3p    | 1.11  | 7.34E-01 | 9.87E-01 |
| mmu-miR-322-3p    | -1.09 | 7.35E-01 | 9.87E-01 |
| mmu-miR-185-5p    | 1.06  | 7.37E-01 | 9.87E-01 |
| mmu-miR-181a-1-3p | -1.12 | 7.37E-01 | 9.87E-01 |
| mmu-miR-222-3p    | -1.08 | 7.38E-01 | 9.87E-01 |
| mmu-miR-1946a     | -1.11 | 7.39E-01 | 9.87E-01 |
| mmu-miR-380-3p    | -1.14 | 7.41E-01 | 9.87E-01 |
| mmu-miR-143-3p    | 1.06  | 7.42E-01 | 9.87E-01 |
| mmu-miR-200c-3p   | 1.06  | 7.43E-01 | 9.87E-01 |
| mmu-miR-324-5p    | 1.07  | 7.47E-01 | 9.87E-01 |
| mmu-miR-19b-1-5p  | 1.09  | 7.53E-01 | 9.87E-01 |
| mmu-let-7e-5p     | 1.06  | 7.54E-01 | 9.87E-01 |
| mmu-miR-154-5p    | 1.07  | 7.57E-01 | 9.87E-01 |
| mmu-miR-19a-3p    | 1.05  | 7.58E-01 | 9.87E-01 |
| mmu-miR-467d-5p   | 1.08  | 7.58E-01 | 9.87E-01 |
| mmu-miR-142-5p    | -1.06 | 7.65E-01 | 9.87E-01 |
| mmu-miR-200c-5p   | 1.08  | 7.66E-01 | 9.87E-01 |
| mmu-miR-23b-3p    | 1.05  | 7.73E-01 | 9.87E-01 |
| mmu-miR-1928      | 1.15  | 7.75E-01 | 9.87E-01 |
| mmu-miR-379-5p    | 1.08  | 7.77E-01 | 9.87E-01 |
| mmu-miR-195a-3p   | -1.11 | 7.78E-01 | 9.87E-01 |
| mmu-miR-669b-5p   | -1.12 | 7.78E-01 | 9.87E-01 |

|                  |       |          |          |
|------------------|-------|----------|----------|
| mmu-miR-363-3p   | 1.07  | 7.81E-01 | 9.87E-01 |
| mmu-miR-1961     | 1.05  | 7.86E-01 | 9.87E-01 |
| mmu-miR-376c-3p  | -1.05 | 7.86E-01 | 9.87E-01 |
| mmu-miR-30c-2-3p | 1.08  | 7.88E-01 | 9.87E-01 |
| mmu-miR-200b-5p  | -1.07 | 7.88E-01 | 9.87E-01 |
| mmu-miR-151-3p   | 1.08  | 7.90E-01 | 9.87E-01 |
| mmu-miR-467a-5p  | -1.05 | 7.90E-01 | 9.87E-01 |
| mmu-miR-666-3p   | -1.27 | 7.92E-01 | 9.87E-01 |
| mmu-miR-1306-3p  | -1.28 | 7.93E-01 | 9.87E-01 |
| mmu-miR-7a-5p    | 1.04  | 7.97E-01 | 9.87E-01 |
| mmu-miR-34a-5p   | -1.05 | 8.01E-01 | 9.87E-01 |
| mmu-miR-92a-2-5p | -1.13 | 8.01E-01 | 9.87E-01 |
| mmu-miR-467g     | -1.12 | 8.02E-01 | 9.87E-01 |
| mmu-miR-299a-3p  | 1.09  | 8.03E-01 | 9.87E-01 |
| mmu-miR-186-3p   | -1.08 | 8.06E-01 | 9.87E-01 |
| mmu-miR-760-3p   | 1.16  | 8.07E-01 | 9.87E-01 |
| mmu-miR-381-3p   | -1.08 | 8.08E-01 | 9.87E-01 |
| mmu-miR-326-3p   | 1.05  | 8.09E-01 | 9.87E-01 |
| mmu-miR-188-3p   | -1.12 | 8.09E-01 | 9.87E-01 |
| mmu-miR-712-5p   | -1.06 | 8.11E-01 | 9.87E-01 |
| mmu-miR-152-3p   | -1.05 | 8.13E-01 | 9.87E-01 |
| mmu-miR-207      | -1.11 | 8.13E-01 | 9.87E-01 |
| mmu-let-7f-5p    | 1.04  | 8.14E-01 | 9.87E-01 |
| mmu-miR-30b-5p   | 1.03  | 8.19E-01 | 9.87E-01 |
| mmu-let-7g-5p    | -1.05 | 8.19E-01 | 9.87E-01 |
| mmu-miR-1983     | -1.07 | 8.20E-01 | 9.87E-01 |
| mmu-miR-20b-3p   | 1.11  | 8.20E-01 | 9.87E-01 |
| mmu-miR-540-5p   | 1.06  | 8.21E-01 | 9.87E-01 |
| mmu-miR-99a-5p   | -1.05 | 8.21E-01 | 9.87E-01 |
| mmu-miR-100-5p   | -1.04 | 8.21E-01 | 9.87E-01 |
| mmu-miR-421-3p   | 1.06  | 8.22E-01 | 9.87E-01 |
| mmu-miR-877-5p   | 1.12  | 8.26E-01 | 9.87E-01 |
| mmu-miR-20a-3p   | -1.06 | 8.28E-01 | 9.87E-01 |
| mmu-miR-411-5p   | 1.04  | 8.29E-01 | 9.87E-01 |
| mmu-miR-139-5p   | 1.05  | 8.31E-01 | 9.87E-01 |
| mmu-miR-488-3p   | 1.07  | 8.34E-01 | 9.87E-01 |
| mmu-miR-491-3p   | -1.06 | 8.34E-01 | 9.87E-01 |
| mmu-miR-376b-3p  | 1.07  | 8.34E-01 | 9.87E-01 |
| mmu-miR-200a-5p  | -1.05 | 8.34E-01 | 9.87E-01 |
| mmu-miR-375-3p   | 1.04  | 8.35E-01 | 9.87E-01 |
| mmu-miR-9-3p     | -1.07 | 8.39E-01 | 9.87E-01 |
| mmu-miR-451a     | -1.06 | 8.40E-01 | 9.87E-01 |
| mmu-miR-1199-5p  | 1.05  | 8.40E-01 | 9.87E-01 |
| mmu-miR-93-5p    | 1.04  | 8.44E-01 | 9.87E-01 |
| mmu-miR-1839-3p  | 1.06  | 8.48E-01 | 9.87E-01 |
| mmu-miR-149-5p   | 1.06  | 8.49E-01 | 9.87E-01 |

|                  |       |          |          |
|------------------|-------|----------|----------|
| mmu-miR-190b-5p  | 1.08  | 8.49E-01 | 9.87E-01 |
| mmu-miR-181b-5p  | 1.04  | 8.50E-01 | 9.87E-01 |
| mmu-miR-2139     | 1.07  | 8.52E-01 | 9.87E-01 |
| mmu-miR-467d-3p  | -1.06 | 8.52E-01 | 9.87E-01 |
| mmu-miR-22-5p    | -1.04 | 8.53E-01 | 9.87E-01 |
| mmu-miR-145a-5p  | 1.04  | 8.59E-01 | 9.87E-01 |
| mmu-miR-503-5p   | 1.04  | 8.59E-01 | 9.87E-01 |
| mmu-miR-219-5p   | -1.05 | 8.60E-01 | 9.87E-01 |
| mmu-miR-1943-5p  | 1.09  | 8.65E-01 | 9.87E-01 |
| mmu-miR-184-3p   | -1.12 | 8.66E-01 | 9.87E-01 |
| mmu-miR-465a-3p  | 1.03  | 8.66E-01 | 9.87E-01 |
| mmu-miR-29b-1-5p | -1.04 | 8.67E-01 | 9.87E-01 |
| mmu-miR-330-5p   | -1.05 | 8.68E-01 | 9.87E-01 |
| mmu-miR-23a-3p   | 1.03  | 8.69E-01 | 9.87E-01 |
| mmu-miR-345-5p   | 1.03  | 8.70E-01 | 9.87E-01 |
| mmu-miR-192-5p   | -1.03 | 8.73E-01 | 9.87E-01 |
| mmu-miR-30e-5p   | -1.03 | 8.73E-01 | 9.87E-01 |
| mmu-miR-17-3p    | -1.03 | 8.76E-01 | 9.87E-01 |
| mmu-miR-30c-5p   | 1.03  | 8.77E-01 | 9.87E-01 |
| mmu-miR-450b-3p  | 1.05  | 8.77E-01 | 9.87E-01 |
| mmu-miR-28a-5p   | 1.03  | 8.80E-01 | 9.87E-01 |
| mmu-miR-191-5p   | -1.02 | 8.82E-01 | 9.87E-01 |
| mmu-miR-127-3p   | -1.04 | 8.84E-01 | 9.87E-01 |
| mmu-miR-378a-3p  | -1.02 | 8.86E-01 | 9.87E-01 |
| mmu-miR-370-3p   | -1.06 | 8.88E-01 | 9.87E-01 |
| mmu-miR-141-3p   | 1.02  | 8.92E-01 | 9.87E-01 |
| mmu-miR-592-5p   | -1.05 | 8.92E-01 | 9.87E-01 |
| mmu-miR-466c-5p  | 1.06  | 8.94E-01 | 9.87E-01 |
| mmu-miR-106b-5p  | 1.02  | 8.95E-01 | 9.87E-01 |
| mmu-miR-342-3p   | 1.02  | 8.98E-01 | 9.87E-01 |
| mmu-miR-218-5p   | 1.03  | 9.01E-01 | 9.87E-01 |
| mmu-miR-323-5p   | 1.03  | 9.01E-01 | 9.87E-01 |
| mmu-miR-491-5p   | 1.03  | 9.01E-01 | 9.87E-01 |
| mmu-miR-676-5p   | -1.06 | 9.01E-01 | 9.87E-01 |
| mmu-miR-30a-5p   | 1.02  | 9.05E-01 | 9.87E-01 |
| mmu-miR-682      | -1.06 | 9.09E-01 | 9.87E-01 |
| mmu-miR-125a-5p  | 1.03  | 9.14E-01 | 9.87E-01 |
| mmu-miR-382-3p   | 1.07  | 9.14E-01 | 9.87E-01 |
| mmu-miR-133b-3p  | 1.02  | 9.15E-01 | 9.87E-01 |
| mmu-miR-101b-3p  | -1.01 | 9.17E-01 | 9.87E-01 |
| mmu-miR-350-3p   | -1.02 | 9.19E-01 | 9.87E-01 |
| mmu-miR-15a-5p   | 1.02  | 9.22E-01 | 9.87E-01 |
| mmu-miR-19b-3p   | 1.01  | 9.27E-01 | 9.87E-01 |
| mmu-miR-181c-5p  | -1.01 | 9.30E-01 | 9.87E-01 |
| mmu-miR-27b-3p   | -1.02 | 9.30E-01 | 9.87E-01 |
| mmu-miR-193b-3p  | -1.02 | 9.31E-01 | 9.87E-01 |

|                 |       |          |          |
|-----------------|-------|----------|----------|
| mmu-miR-203-3p  | -1.01 | 9.31E-01 | 9.87E-01 |
| mmu-miR-103-3p  | -1.01 | 9.32E-01 | 9.87E-01 |
| mmu-miR-101a-3p | -1.01 | 9.33E-01 | 9.87E-01 |
| mmu-miR-299a-5p | -1.02 | 9.35E-01 | 9.87E-01 |
| mmu-miR-291a-3p | 1.07  | 9.36E-01 | 9.87E-01 |
| mmu-miR-1982-5p | 1.02  | 9.37E-01 | 9.87E-01 |
| mmu-miR-331-3p  | 1.03  | 9.38E-01 | 9.87E-01 |
| mmu-miR-300-3p  | 1.01  | 9.41E-01 | 9.87E-01 |
| mmu-miR-3107-5p | 1.02  | 9.41E-01 | 9.87E-01 |
| mmu-miR-20a-5p  | 1.01  | 9.41E-01 | 9.87E-01 |
| mmu-miR-204-5p  | -1.01 | 9.42E-01 | 9.87E-01 |
| mmu-miR-301b-3p | 1.02  | 9.43E-01 | 9.87E-01 |
| mmu-miR-29c-3p  | -1.01 | 9.45E-01 | 9.87E-01 |
| mmu-miR-125b-5p | -1.02 | 9.45E-01 | 9.87E-01 |
| mmu-miR-193a-3p | -1.01 | 9.45E-01 | 9.87E-01 |
| mmu-let-7a-1-3p | -1.01 | 9.49E-01 | 9.87E-01 |
| mmu-miR-107-3p  | 1.01  | 9.53E-01 | 9.87E-01 |
| mmu-miR-466g    | -1.02 | 9.54E-01 | 9.87E-01 |
| mmu-miR-215-5p  | -1.01 | 9.55E-01 | 9.87E-01 |
| mmu-miR-669c-5p | -1.02 | 9.56E-01 | 9.87E-01 |
| mmu-miR-199a-5p | 1.01  | 9.59E-01 | 9.87E-01 |
| mmu-miR-339-5p  | -1.01 | 9.59E-01 | 9.87E-01 |
| mmu-miR-29a-3p  | 1.01  | 9.60E-01 | 9.87E-01 |
| mmu-miR-140-5p  | -1.01 | 9.60E-01 | 9.87E-01 |
| mmu-miR-1968-5p | -1.02 | 9.60E-01 | 9.87E-01 |
| mmu-miR-466a-3p | -1.03 | 9.60E-01 | 9.87E-01 |
| mmu-miR-365-3p  | -1.01 | 9.62E-01 | 9.87E-01 |
| mmu-miR-128-3p  | -1.01 | 9.62E-01 | 9.87E-01 |
| mmu-miR-380-5p  | -1.01 | 9.63E-01 | 9.87E-01 |
| mmu-miR-133a-3p | -1.01 | 9.64E-01 | 9.87E-01 |
| mmu-miR-140-3p  | -1.01 | 9.65E-01 | 9.87E-01 |
| mmu-miR-9-5p    | -1.01 | 9.69E-01 | 9.87E-01 |
| mmu-miR-669a-5p | 1.01  | 9.70E-01 | 9.87E-01 |
| mmu-miR-691     | -1.02 | 9.71E-01 | 9.87E-01 |
| mmu-miR-296-5p  | -1.01 | 9.71E-01 | 9.87E-01 |
| mmu-miR-322-5p  | 1.00  | 9.82E-01 | > 0.99   |
| mmu-miR-671-5p  | 1.00  | 9.86E-01 | > 0.99   |
| mmu-miR-181a-5p | -1.00 | 9.89E-01 | > 0.99   |
| mmu-miR-542-5p  | 1.00  | > 0.99   | > 0.99   |
| mmu-miR-344-3p  | -1.00 | > 0.99   | > 0.99   |
| mmu-miR-338-5p  | 1.00  | > 0.99   | > 0.99   |
| mmu-miR-31-3p   | -1.00 | > 0.99   | > 0.99   |
| mmu-miR-200a-3p | 1.00  | > 0.99   | > 0.99   |

**Supplementary Table 2.** Intestinal miRNAs altered in 4 days study. miRNAs differentially expressed after the consumption of a high-fat diet (HFD) for 4 days, in male C57BL/6 mice. <sup>a</sup> In bold, microRNAs with significant change, unpaired T-test,  $p < 0.05$ . <sup>b</sup> 4 days HFD vs. control. <sup>c</sup> Benjamini and Hochberg corrected values.

| miRNA <sup>a</sup>      | Fold Change <sup>b</sup> | P-value  | P (Benjamini-Hochberg) <sup>c</sup> |
|-------------------------|--------------------------|----------|-------------------------------------|
| <b>mmu-miR-218-2-3p</b> | -11.65                   | 6.08E-05 | 3.05E-02                            |
| <b>mmu-miR-346-5p</b>   | -6.99                    | 1.08E-04 | 3.05E-02                            |
| <b>mmu-miR-879-3p</b>   | -8.12                    | 1.58E-04 | 3.05E-02                            |
| <b>mmu-miR-10b-3p</b>   | 8.51                     | 2.28E-04 | 3.29E-02                            |
| <b>mmu-miR-138-1-3p</b> | 3.04                     | 5.12E-04 | 4.93E-02                            |
| <b>mmu-miR-466b-5p</b>  | -5.95                    | 6.07E-04 | 5.01E-02                            |
| <b>mmu-miR-147-3p</b>   | -3.58                    | 7.02E-04 | 5.07E-02                            |
| <b>mmu-miR-1894-3p</b>  | -3.84                    | 1.70E-03 | 1.09E-01                            |
| <b>mmu-miR-544-3p</b>   | -3.73                    | 2.51E-03 | 1.32E-01                            |
| <b>mmu-miR-711</b>      | 4.10                     | 3.00E-03 | 1.44E-01                            |
| <b>mmu-miR-344-3p</b>   | 3.61                     | 3.59E-03 | 1.60E-01                            |
| <b>mmu-miR-146b-3p</b>  | 4.07                     | 6.28E-03 | 2.59E-01                            |
| <b>mmu-miR-666-3p</b>   | -4.37                    | 8.25E-03 | 3.18E-01                            |
| <b>mmu-miR-673-5p</b>   | -6.53                    | 1.10E-02 | 3.74E-01                            |
| <b>mmu-miR-466k</b>     | 5.35                     | 1.75E-02 | 5.17E-01                            |
| <b>mmu-miR-216b-5p</b>  | -7.67                    | 1.79E-02 | 5.17E-01                            |
| <b>mmu-miR-212-3p</b>   | 2.15                     | 1.88E-02 | 5.17E-01                            |
| <b>mmu-miR-208b-3p</b>  | -2.79                    | 1.98E-02 | 5.20E-01                            |
| <b>mmu-miR-370-3p</b>   | 2.95                     | 2.18E-02 | 5.47E-01                            |
| <b>mmu-miR-452-5p</b>   | 2.12                     | 2.49E-02 | 6.00E-01                            |
| <b>mmu-miR-764-5p</b>   | 2.32                     | 3.15E-02 | 6.75E-01                            |
| <b>mmu-miR-491-3p</b>   | -1.93                    | 4.25E-02 | 8.07E-01                            |
| <b>mmu-miR-216a-5p</b>  | -5.20                    | 4.33E-02 | 8.07E-01                            |
| <b>mmu-miR-298-5p</b>   | 1.84                     | 4.56E-02 | 8.23E-01                            |
| <b>mmu-miR-291a-5p</b>  | 2.94                     | 4.88E-02 | 8.55E-01                            |
| mmu-miR-1898            | 3.27                     | 5.11E-02 | 8.57E-01                            |
| mmu-miR-384-3p          | 2.37                     | 5.47E-02 | 8.57E-01                            |
| mmu-miR-1982.1-3p       | -29.38                   | 5.50E-02 | 8.57E-01                            |
| mmu-miR-344d-3p         | 2.57                     | 5.78E-02 | 8.57E-01                            |
| mmu-miR-16-1-3p         | -1.83                    | 5.91E-02 | 8.57E-01                            |
| mmu-miR-1900            | -1.89                    | 5.93E-02 | 8.57E-01                            |
| mmu-miR-1983            | 1.96                     | 6.25E-02 | 8.61E-01                            |
| mmu-miR-139-3p          | 2.33                     | 6.26E-02 | 8.61E-01                            |
| mmu-miR-672-5p          | 1.94                     | 6.53E-02 | 8.70E-01                            |
| mmu-miR-293-3p          | -2.19                    | 6.92E-02 | 8.70E-01                            |
| mmu-miR-873a-5p         | -3.60                    | 7.16E-02 | 8.70E-01                            |
| mmu-miR-294-5p          | 2.45                     | 7.51E-02 | 8.70E-01                            |
| mmu-miR-713             | -2.17                    | 7.60E-02 | 8.70E-01                            |
| mmu-miR-1933-3p         | -2.10                    | 7.61E-02 | 8.70E-01                            |
| mmu-miR-1941-3p         | -1.86                    | 7.94E-02 | 8.70E-01                            |

|                   |       |          |          |
|-------------------|-------|----------|----------|
| mmu-miR-669c-5p   | -3.17 | 8.32E-02 | 8.70E-01 |
| mmu-miR-686       | 2.44  | 8.32E-02 | 8.70E-01 |
| mmu-miR-184-3p    | -1.66 | 8.33E-02 | 8.70E-01 |
| mmu-miR-383-5p    | -2.23 | 8.40E-02 | 8.70E-01 |
| mmu-miR-669d-5p   | -2.28 | 8.46E-02 | 8.70E-01 |
| mmu-miR-105       | -2.40 | 8.60E-02 | 8.70E-01 |
| mmu-miR-684       | -3.09 | 8.71E-02 | 8.70E-01 |
| mmu-miR-1957a     | 2.39  | 9.38E-02 | 8.83E-01 |
| mmu-miR-676-3p    | -1.98 | 9.47E-02 | 8.83E-01 |
| mmu-miR-692       | 4.04  | 9.95E-02 | 8.85E-01 |
| mmu-miR-466f      | -3.16 | 1.01E-01 | 8.85E-01 |
| mmu-miR-296-5p    | -1.57 | 1.03E-01 | 8.85E-01 |
| mmu-miR-331-5p    | 2.45  | 1.08E-01 | 9.03E-01 |
| mmu-miR-483-3p    | 2.62  | 1.09E-01 | 9.03E-01 |
| mmu-miR-669j      | -2.29 | 1.12E-01 | 9.03E-01 |
| mmu-miR-490-5p    | -1.50 | 1.13E-01 | 9.03E-01 |
| mmu-miR-1903      | -2.95 | 1.14E-01 | 9.03E-01 |
| mmu-miR-1195      | 1.40  | 1.17E-01 | 9.10E-01 |
| mmu-miR-18a-5p    | 1.63  | 1.19E-01 | 9.20E-01 |
| mmu-miR-23a-5p    | 2.35  | 1.25E-01 | 9.42E-01 |
| mmu-miR-691       | -1.76 | 1.26E-01 | 9.42E-01 |
| mmu-miR-195a-3p   | -2.19 | 1.27E-01 | 9.42E-01 |
| mmu-miR-217-5p    | -2.72 | 1.30E-01 | 9.42E-01 |
| mmu-let-7a-2-3p   | -1.86 | 1.33E-01 | 9.42E-01 |
| mmu-miR-291a-3p   | 3.34  | 1.40E-01 | 9.78E-01 |
| mmu-miR-148a-5p   | -2.01 | 1.48E-01 | > 0.99   |
| mmu-miR-1952      | 1.47  | 1.49E-01 | > 0.99   |
| mmu-miR-33-3p     | -1.69 | 1.52E-01 | > 0.99   |
| mmu-miR-323-5p    | -2.21 | 1.52E-01 | > 0.99   |
| mmu-miR-465b-5p   | -1.69 | 1.58E-01 | > 0.99   |
| mmu-miR-125b-2-3p | -3.36 | 1.58E-01 | > 0.99   |
| mmu-miR-200c-5p   | 1.58  | 1.58E-01 | > 0.99   |
| mmu-miR-450a-5p   | -3.27 | 1.59E-01 | > 0.99   |
| mmu-miR-26b-3p    | -1.51 | 1.77E-01 | > 0.99   |
| mmu-miR-30d-5p    | -1.41 | 1.78E-01 | > 0.99   |
| mmu-miR-1955-5p   | -2.94 | 1.82E-01 | > 0.99   |
| mmu-miR-7a-1-3p   | -1.65 | 1.83E-01 | > 0.99   |
| mmu-miR-132-3p    | 1.60  | 1.86E-01 | > 0.99   |
| mmu-miR-205-5p    | -1.99 | 1.88E-01 | > 0.99   |
| mmu-miR-598-3p    | -2.26 | 1.89E-01 | > 0.99   |
| mmu-miR-667-3p    | -1.45 | 1.91E-01 | > 0.99   |
| mmu-miR-376c-3p   | -1.44 | 1.93E-01 | > 0.99   |

|                 |       |          |        |
|-----------------|-------|----------|--------|
| mmu-miR-382-3p  | -1.95 | 1.96E-01 | > 0.99 |
| mmu-miR-297b-5p | 1.91  | 1.96E-01 | > 0.99 |
| mmu-miR-202-3p  | 1.52  | 2.02E-01 | > 0.99 |
| mmu-miR-297a-5p | -1.62 | 2.06E-01 | > 0.99 |
| mmu-miR-1249-3p | -1.80 | 2.07E-01 | > 0.99 |
| mmu-miR-503-5p  | -1.37 | 2.07E-01 | > 0.99 |
| mmu-miR-153-3p  | -1.60 | 2.13E-01 | > 0.99 |
| mmu-miR-330-5p  | -2.37 | 2.15E-01 | > 0.99 |
| mmu-miR-18b-5p  | 2.25  | 2.15E-01 | > 0.99 |
| mmu-miR-1902    | 1.84  | 2.22E-01 | > 0.99 |
| mmu-miR-511-5p  | -1.96 | 2.27E-01 | > 0.99 |
| mmu-miR-1966-5p | 1.52  | 2.27E-01 | > 0.99 |
| mmu-miR-486-3p  | -1.51 | 2.29E-01 | > 0.99 |
| mmu-miR-448-3p  | 1.59  | 2.32E-01 | > 0.99 |
| mmu-miR-138-5p  | -1.73 | 2.35E-01 | > 0.99 |
| mmu-miR-214-3p  | -1.41 | 2.36E-01 | > 0.99 |
| mmu-miR-362-5p  | 1.57  | 2.36E-01 | > 0.99 |
| mmu-miR-694     | 1.53  | 2.42E-01 | > 0.99 |
| mmu-miR-468-3p  | 1.74  | 2.46E-01 | > 0.99 |
| mmu-miR-211-5p  | 1.47  | 2.52E-01 | > 0.99 |
| mmu-miR-339-5p  | -1.25 | 2.54E-01 | > 0.99 |
| mmu-miR-467g    | -1.76 | 2.55E-01 | > 0.99 |
| mmu-miR-297a-3p | -1.50 | 2.59E-01 | > 0.99 |
| mmu-miR-503-3p  | -1.66 | 2.63E-01 | > 0.99 |
| mmu-miR-700-3p  | -1.81 | 2.63E-01 | > 0.99 |
| mmu-miR-1947-5p | 1.97  | 2.71E-01 | > 0.99 |
| mmu-miR-127-5p  | -1.89 | 2.72E-01 | > 0.99 |
| mmu-miR-181c-5p | -1.41 | 2.77E-01 | > 0.99 |
| mmu-miR-330-3p  | -1.53 | 2.88E-01 | > 0.99 |
| mmu-miR-742-3p  | 1.69  | 2.88E-01 | > 0.99 |
| mmu-let-7c-1-3p | -1.32 | 2.99E-01 | > 0.99 |
| mmu-miR-101a-5p | -1.54 | 3.00E-01 | > 0.99 |
| mmu-miR-1929-5p | -1.36 | 3.00E-01 | > 0.99 |
| mmu-miR-193a-5p | -1.39 | 3.01E-01 | > 0.99 |
| mmu-miR-350-3p  | -1.34 | 3.02E-01 | > 0.99 |
| mmu-miR-491-5p  | 1.60  | 3.04E-01 | > 0.99 |
| mmu-miR-7b-5p   | -1.50 | 3.05E-01 | > 0.99 |
| mmu-miR-671-3p  | 1.45  | 3.06E-01 | > 0.99 |
| mmu-miR-323-3p  | 1.58  | 3.07E-01 | > 0.99 |
| mmu-miR-1948-3p | -1.91 | 3.10E-01 | > 0.99 |
| mmu-miR-29c-5p  | -1.36 | 3.12E-01 | > 0.99 |
| mmu-miR-190a-5p | -1.35 | 3.14E-01 | > 0.99 |
| mmu-miR-542-3p  | -1.52 | 3.20E-01 | > 0.99 |
| mmu-miR-126-5p  | -1.39 | 3.25E-01 | > 0.99 |
| mmu-miR-92b-3p  | 1.50  | 3.31E-01 | > 0.99 |
| mmu-miR-129-5p  | 1.92  | 3.32E-01 | > 0.99 |

|                   |       |          |        |
|-------------------|-------|----------|--------|
| mmu-miR-326-3p    | -1.30 | 3.32E-01 | > 0.99 |
| mmu-miR-7a-5p     | 1.34  | 3.40E-01 | > 0.99 |
| mmu-miR-802-5p    | -1.34 | 3.42E-01 | > 0.99 |
| mmu-miR-378a-5p   | -1.39 | 3.42E-01 | > 0.99 |
| mmu-miR-34a-5p    | -1.27 | 3.44E-01 | > 0.99 |
| mmu-miR-409-3p    | 1.80  | 3.48E-01 | > 0.99 |
| mmu-miR-706       | 1.37  | 3.50E-01 | > 0.99 |
| mmu-miR-871-5p    | -1.35 | 3.60E-01 | > 0.99 |
| mmu-miR-301b-3p   | 1.55  | 3.64E-01 | > 0.99 |
| mmu-miR-26a-1-3p  | -1.49 | 3.66E-01 | > 0.99 |
| mmu-miR-1956      | -1.59 | 3.67E-01 | > 0.99 |
| mmu-miR-654-3p    | -1.35 | 3.67E-01 | > 0.99 |
| mmu-miR-466h-5p   | -1.51 | 3.68E-01 | > 0.99 |
| mmu-miR-188-3p    | -1.73 | 3.69E-01 | > 0.99 |
| mmu-miR-34b-3p    | 1.76  | 3.71E-01 | > 0.99 |
| mmu-miR-34c-3p    | 1.68  | 3.73E-01 | > 0.99 |
| mmu-miR-375-3p    | -1.29 | 3.76E-01 | > 0.99 |
| mmu-miR-29b-1-5p  | -1.63 | 3.78E-01 | > 0.99 |
| mmu-miR-130a-3p   | -1.86 | 3.80E-01 | > 0.99 |
| mmu-miR-467f      | -1.31 | 3.84E-01 | > 0.99 |
| mmu-miR-194-5p    | -1.29 | 3.84E-01 | > 0.99 |
| mmu-miR-1897-5p   | 1.34  | 3.86E-01 | > 0.99 |
| mmu-miR-494-3p    | -1.33 | 3.87E-01 | > 0.99 |
| mmu-miR-369-3p    | 1.50  | 3.93E-01 | > 0.99 |
| mmu-miR-709       | 1.19  | 3.94E-01 | > 0.99 |
| mmu-miR-96-5p     | -1.29 | 3.99E-01 | > 0.99 |
| mmu-miR-215-5p    | -1.34 | 4.02E-01 | > 0.99 |
| mmu-miR-874-3p    | -1.38 | 4.03E-01 | > 0.99 |
| mmu-miR-187-3p    | -1.38 | 4.05E-01 | > 0.99 |
| mmu-miR-376b-5p   | 1.86  | 4.06E-01 | > 0.99 |
| mmu-miR-338-5p    | -1.42 | 4.08E-01 | > 0.99 |
| mmu-miR-322-3p    | -1.45 | 4.10E-01 | > 0.99 |
| mmu-miR-15a-3p    | -1.43 | 4.12E-01 | > 0.99 |
| mmu-miR-33-5p     | -1.33 | 4.13E-01 | > 0.99 |
| mmu-miR-369-5p    | 1.81  | 4.15E-01 | > 0.99 |
| mmu-miR-31-3p     | -1.33 | 4.16E-01 | > 0.99 |
| mmu-miR-129-2-3p  | -2.29 | 4.20E-01 | > 0.99 |
| mmu-miR-27b-5p    | -1.32 | 4.23E-01 | > 0.99 |
| mmu-miR-488-3p    | 1.50  | 4.27E-01 | > 0.99 |
| mmu-miR-181a-1-3p | -1.69 | 4.32E-01 | > 0.99 |
| mmu-miR-455-3p    | -1.40 | 4.37E-01 | > 0.99 |
| mmu-miR-299a-5p   | -1.54 | 4.41E-01 | > 0.99 |
| mmu-miR-382-5p    | 1.28  | 4.43E-01 | > 0.99 |
| mmu-miR-1199-5p   | -1.30 | 4.47E-01 | > 0.99 |
| mmu-let-7f-2-3p   | -1.36 | 4.48E-01 | > 0.99 |
| mmu-miR-140-3p    | -1.24 | 4.49E-01 | > 0.99 |

|                   |       |          |        |
|-------------------|-------|----------|--------|
| mmu-miR-18a-3p    | 1.32  | 4.50E-01 | > 0.99 |
| mmu-miR-296-3p    | -1.30 | 4.53E-01 | > 0.99 |
| mmu-miR-142-5p    | -1.29 | 4.55E-01 | > 0.99 |
| mmu-miR-28a-3p    | -1.26 | 4.67E-01 | > 0.99 |
| mmu-miR-712-5p    | 1.19  | 4.68E-01 | > 0.99 |
| mmu-miR-151-3p    | -1.24 | 4.69E-01 | > 0.99 |
| mmu-miR-434-3p    | -1.41 | 4.69E-01 | > 0.99 |
| mmu-miR-467b-5p   | 1.44  | 4.71E-01 | > 0.99 |
| mmu-miR-30b-5p    | -1.23 | 4.75E-01 | > 0.99 |
| mmu-miR-1928      | -1.28 | 4.75E-01 | > 0.99 |
| mmu-miR-423-5p    | -1.17 | 4.75E-01 | > 0.99 |
| mmu-miR-127-3p    | -1.31 | 4.77E-01 | > 0.99 |
| mmu-miR-3107-5p   | -1.30 | 4.78E-01 | > 0.99 |
| mmu-miR-146a-5p   | -1.20 | 4.80E-01 | > 0.99 |
| mmu-miR-29c-3p    | -1.25 | 4.80E-01 | > 0.99 |
| mmu-miR-710       | -1.53 | 4.81E-01 | > 0.99 |
| mmu-miR-1b-5p     | -1.47 | 4.81E-01 | > 0.99 |
| mmu-miR-133a-3p   | -1.23 | 4.83E-01 | > 0.99 |
| mmu-miR-214-5p    | -1.28 | 4.89E-01 | > 0.99 |
| mmu-miR-125b-1-3p | -1.67 | 4.91E-01 | > 0.99 |
| mmu-miR-551b-3p   | -1.31 | 4.91E-01 | > 0.99 |
| mmu-miR-669e-5p   | -1.50 | 4.92E-01 | > 0.99 |
| mmu-miR-27a-5p    | -1.27 | 4.95E-01 | > 0.99 |
| mmu-miR-1964-3p   | -1.68 | 4.96E-01 | > 0.99 |
| mmu-miR-150-5p    | -1.27 | 4.97E-01 | > 0.99 |
| mmu-miR-669b-5p   | -1.65 | 4.99E-01 | > 0.99 |
| mmu-miR-151-5p    | -1.23 | 4.99E-01 | > 0.99 |
| mmu-miR-546       | 1.51  | 5.00E-01 | > 0.99 |
| mmu-miR-196a-2-3p | 1.29  | 5.00E-01 | > 0.99 |
| mmu-miR-30c-5p    | -1.25 | 5.00E-01 | > 0.99 |
| mmu-miR-17-5p     | 1.26  | 5.01E-01 | > 0.99 |
| mmu-let-7g-3p     | -1.30 | 5.01E-01 | > 0.99 |
| mmu-miR-540-3p    | 1.49  | 5.03E-01 | > 0.99 |
| mmu-miR-30e-3p    | -1.22 | 5.05E-01 | > 0.99 |
| mmu-miR-466d-3p   | 1.41  | 5.06E-01 | > 0.99 |
| mmu-miR-760-3p    | 1.42  | 5.08E-01 | > 0.99 |
| mmu-miR-200a-3p   | -1.21 | 5.08E-01 | > 0.99 |
| mmu-miR-744-3p    | -1.20 | 5.09E-01 | > 0.99 |
| mmu-miR-376a-3p   | -1.33 | 5.20E-01 | > 0.99 |
| mmu-miR-652-3p    | -1.22 | 5.21E-01 | > 0.99 |
| mmu-miR-384-5p    | -1.66 | 5.23E-01 | > 0.99 |
| mmu-miR-15a-5p    | -1.20 | 5.26E-01 | > 0.99 |
| mmu-miR-484       | 1.21  | 5.27E-01 | > 0.99 |
| mmu-miR-10a-5p    | -1.18 | 5.27E-01 | > 0.99 |
| mmu-miR-30c-1-3p  | 1.35  | 5.27E-01 | > 0.99 |
| mmu-miR-1907      | -1.55 | 5.29E-01 | > 0.99 |

|                 |       |          |        |
|-----------------|-------|----------|--------|
| mmu-miR-496a-3p | -1.50 | 5.29E-01 | > 0.99 |
| mmu-miR-380-3p  | -1.32 | 5.30E-01 | > 0.99 |
| mmu-miR-29b-3p  | -1.21 | 5.34E-01 | > 0.99 |
| mmu-miR-183-5p  | -1.26 | 5.34E-01 | > 0.99 |
| mmu-miR-668-3p  | 1.47  | 5.41E-01 | > 0.99 |
| mmu-miR-1981-5p | 1.30  | 5.41E-01 | > 0.99 |
| mmu-let-7g-5p   | -1.21 | 5.42E-01 | > 0.99 |
| mmu-miR-681     | -1.28 | 5.45E-01 | > 0.99 |
| mmu-miR-196a-5p | 1.42  | 5.46E-01 | > 0.99 |
| mmu-miR-26b-5p  | -1.22 | 5.46E-01 | > 0.99 |
| mmu-miR-20a-5p  | 1.21  | 5.47E-01 | > 0.99 |
| mmu-miR-378a-3p | -1.18 | 5.49E-01 | > 0.99 |
| mmu-miR-1839-5p | -1.24 | 5.51E-01 | > 0.99 |
| mmu-miR-467c-5p | -1.40 | 5.57E-01 | > 0.99 |
| mmu-miR-1930-5p | -1.24 | 5.58E-01 | > 0.99 |
| mmu-miR-329-3p  | -1.32 | 5.59E-01 | > 0.99 |
| mmu-miR-872-5p  | -1.23 | 5.61E-01 | > 0.99 |
| mmu-miR-466g    | 1.14  | 5.62E-01 | > 0.99 |
| mmu-miR-181b-5p | -1.23 | 5.63E-01 | > 0.99 |
| mmu-miR-1961    | -1.16 | 5.64E-01 | > 0.99 |
| mmu-miR-677-5p  | -1.56 | 5.67E-01 | > 0.99 |
| mmu-miR-320-3p  | -1.14 | 5.68E-01 | > 0.99 |
| mmu-miR-379-5p  | -1.28 | 5.71E-01 | > 0.99 |
| mmu-miR-26a-5p  | -1.22 | 5.72E-01 | > 0.99 |
| mmu-miR-676-5p  | 1.40  | 5.73E-01 | > 0.99 |
| mmu-miR-1191    | -1.22 | 5.75E-01 | > 0.99 |
| mmu-miR-200b-3p | -1.20 | 5.80E-01 | > 0.99 |
| mmu-miR-181a-5p | -1.19 | 5.81E-01 | > 0.99 |
| mmu-miR-224-5p  | -1.22 | 5.81E-01 | > 0.99 |
| mmu-miR-1934-5p | -1.47 | 5.81E-01 | > 0.99 |
| mmu-miR-155-5p  | -1.22 | 5.83E-01 | > 0.99 |
| mmu-miR-1935    | 1.54  | 5.86E-01 | > 0.99 |
| mmu-let-7e-3p   | -1.25 | 5.86E-01 | > 0.99 |
| mmu-miR-744-5p  | -1.12 | 5.87E-01 | > 0.99 |
| mmu-miR-137-3p  | 1.27  | 5.92E-01 | > 0.99 |
| mmu-miR-376b-3p | -1.28 | 5.94E-01 | > 0.99 |
| mmu-miR-291b-5p | 1.23  | 5.95E-01 | > 0.99 |
| mmu-miR-297c-5p | -1.28 | 5.95E-01 | > 0.99 |
| mmu-miR-433-5p  | -1.33 | 5.95E-01 | > 0.99 |
| mmu-miR-365-3p  | -1.18 | 5.99E-01 | > 0.99 |
| mmu-miR-340-3p  | -1.18 | 5.99E-01 | > 0.99 |
| mmu-miR-142-3p  | -1.17 | 6.00E-01 | > 0.99 |
| mmu-miR-20a-3p  | 1.22  | 6.01E-01 | > 0.99 |
| mmu-miR-10b-5p  | -1.16 | 6.03E-01 | > 0.99 |
| mmu-miR-325-3p  | -1.18 | 6.03E-01 | > 0.99 |
| mmu-miR-27a-3p  | -1.16 | 6.04E-01 | > 0.99 |

|                  |       |          |        |
|------------------|-------|----------|--------|
| mmu-miR-501-3p   | 1.19  | 6.08E-01 | > 0.99 |
| mmu-miR-124-3p   | 1.19  | 6.10E-01 | > 0.99 |
| mmu-miR-92a-2-5p | 1.30  | 6.10E-01 | > 0.99 |
| mmu-miR-207      | 1.31  | 6.15E-01 | > 0.99 |
| mmu-let-7b-5p    | -1.17 | 6.16E-01 | > 0.99 |
| mmu-miR-449a-5p  | 1.24  | 6.18E-01 | > 0.99 |
| mmu-miR-543-3p   | -1.31 | 6.19E-01 | > 0.99 |
| mmu-miR-219-1-3p | 1.40  | 6.24E-01 | > 0.99 |
| mmu-miR-145a-3p  | -1.19 | 6.24E-01 | > 0.99 |
| mmu-miR-15b-5p   | -1.19 | 6.27E-01 | > 0.99 |
| mmu-miR-762      | -1.11 | 6.27E-01 | > 0.99 |
| mmu-miR-106b-3p  | -1.18 | 6.30E-01 | > 0.99 |
| mmu-miR-135a-5p  | -1.19 | 6.31E-01 | > 0.99 |
| mmu-miR-466j     | 1.51  | 6.35E-01 | > 0.99 |
| mmu-miR-130b-5p  | -1.20 | 6.38E-01 | > 0.99 |
| mmu-miR-191-3p   | 1.18  | 6.40E-01 | > 0.99 |
| mmu-miR-182-5p   | -1.15 | 6.41E-01 | > 0.99 |
| mmu-miR-206-3p   | 1.33  | 6.42E-01 | > 0.99 |
| mmu-miR-139-5p   | -1.14 | 6.45E-01 | > 0.99 |
| mmu-miR-200a-5p  | -1.15 | 6.47E-01 | > 0.99 |
| mmu-miR-200b-5p  | -1.16 | 6.51E-01 | > 0.99 |
| mmu-miR-704      | 1.32  | 6.56E-01 | > 0.99 |
| mmu-miR-30d-3p   | -1.17 | 6.56E-01 | > 0.99 |
| mmu-miR-411-3p   | -1.11 | 6.57E-01 | > 0.99 |
| mmu-miR-1186a    | -1.33 | 6.57E-01 | > 0.99 |
| mmu-miR-31-5p    | -1.14 | 6.57E-01 | > 0.99 |
| mmu-miR-340-5p   | -1.25 | 6.58E-01 | > 0.99 |
| mmu-miR-590-3p   | -1.13 | 6.61E-01 | > 0.99 |
| mmu-miR-351-5p   | -1.17 | 6.64E-01 | > 0.99 |
| mmu-miR-539-5p   | 1.41  | 6.67E-01 | > 0.99 |
| mmu-let-7d-3p    | 1.20  | 6.68E-01 | > 0.99 |
| mmu-miR-331-3p   | 1.22  | 6.71E-01 | > 0.99 |
| mmu-miR-669l-5p  | -1.33 | 6.72E-01 | > 0.99 |
| mmu-miR-1967     | -1.15 | 6.73E-01 | > 0.99 |
| mmu-miR-434-5p   | -1.20 | 6.73E-01 | > 0.99 |
| mmu-miR-708-3p   | -1.32 | 6.76E-01 | > 0.99 |
| mmu-miR-199a-3p  | -1.14 | 6.79E-01 | > 0.99 |
| mmu-miR-337-5p   | 1.26  | 6.83E-01 | > 0.99 |
| mmu-miR-322-5p   | -1.14 | 6.85E-01 | > 0.99 |
| mmu-miR-140-5p   | -1.14 | 6.85E-01 | > 0.99 |
| mmu-miR-466d-5p  | -1.49 | 6.86E-01 | > 0.99 |
| mmu-miR-19b-1-5p | -1.20 | 6.87E-01 | > 0.99 |
| mmu-miR-29a-3p   | -1.14 | 6.89E-01 | > 0.99 |
| mmu-miR-203-3p   | -1.12 | 6.90E-01 | > 0.99 |
| mmu-miR-425-5p   | -1.13 | 6.90E-01 | > 0.99 |
| mmu-miR-450b-5p  | -1.57 | 6.94E-01 | > 0.99 |

|                 |       |          |        |
|-----------------|-------|----------|--------|
| mmu-miR-338-3p  | -1.15 | 6.96E-01 | > 0.99 |
| mmu-miR-342-3p  | -1.13 | 7.00E-01 | > 0.99 |
| mmu-miR-1951    | 1.18  | 7.04E-01 | > 0.99 |
| mmu-miR-1247-5p | -1.27 | 7.05E-01 | > 0.99 |
| mmu-miR-1198-5p | -1.12 | 7.07E-01 | > 0.99 |
| mmu-miR-141-3p  | -1.12 | 7.08E-01 | > 0.99 |
| mmu-miR-203-5p  | -1.10 | 7.11E-01 | > 0.99 |
| mmu-miR-145a-5p | -1.16 | 7.11E-01 | > 0.99 |
| mmu-miR-574-3p  | -1.14 | 7.11E-01 | > 0.99 |
| mmu-miR-362-3p  | 1.16  | 7.11E-01 | > 0.99 |
| mmu-let-7a-5p   | -1.12 | 7.12E-01 | > 0.99 |
| mmu-miR-9-3p    | 1.25  | 7.14E-01 | > 0.99 |
| mmu-miR-199a-5p | -1.12 | 7.17E-01 | > 0.99 |
| mmu-miR-377-3p  | 1.15  | 7.18E-01 | > 0.99 |
| mmu-miR-1839-3p | -1.13 | 7.18E-01 | > 0.99 |
| mmu-miR-425-3p  | -1.13 | 7.19E-01 | > 0.99 |
| mmu-miR-466c-5p | 1.21  | 7.24E-01 | > 0.99 |
| mmu-miR-125b-5p | -1.11 | 7.27E-01 | > 0.99 |
| mmu-miR-500-3p  | 1.13  | 7.30E-01 | > 0.99 |
| mmu-miR-191-5p  | -1.13 | 7.31E-01 | > 0.99 |
| mmu-miR-742-5p  | 1.16  | 7.31E-01 | > 0.99 |
| mmu-miR-29a-5p  | -1.15 | 7.32E-01 | > 0.99 |
| mmu-miR-199b-5p | -1.12 | 7.35E-01 | > 0.99 |
| mmu-miR-212-5p  | 1.17  | 7.36E-01 | > 0.99 |
| mmu-miR-300-3p  | 1.16  | 7.38E-01 | > 0.99 |
| mmu-miR-1949    | 1.09  | 7.41E-01 | > 0.99 |
| mmu-miR-210-3p  | 1.10  | 7.41E-01 | > 0.99 |
| mmu-miR-183-3p  | 1.12  | 7.43E-01 | > 0.99 |
| mmu-miR-411-5p  | 1.14  | 7.44E-01 | > 0.99 |
| mmu-miR-374b-5p | -1.08 | 7.50E-01 | > 0.99 |
| mmu-miR-125a-5p | -1.10 | 7.52E-01 | > 0.99 |
| mmu-miR-190b-5p | -1.13 | 7.52E-01 | > 0.99 |
| mmu-miR-2137    | 1.09  | 7.53E-01 | > 0.99 |
| mmu-miR-804     | 1.15  | 7.53E-01 | > 0.99 |
| mmu-miR-181d-5p | -1.11 | 7.55E-01 | > 0.99 |
| mmu-miR-16-5p   | -1.10 | 7.56E-01 | > 0.99 |
| mmu-miR-19a-3p  | 1.10  | 7.58E-01 | > 0.99 |
| mmu-miR-433-3p  | -1.17 | 7.58E-01 | > 0.99 |
| mmu-miR-133b-3p | -1.12 | 7.59E-01 | > 0.99 |
| mmu-miR-34b-5p  | -1.16 | 7.60E-01 | > 0.99 |
| mmu-miR-196b-5p | 1.23  | 7.61E-01 | > 0.99 |
| mmu-miR-30e-5p  | -1.10 | 7.61E-01 | > 0.99 |
| mmu-miR-504-5p  | -1.52 | 7.61E-01 | > 0.99 |
| mmu-let-7c-5p   | -1.09 | 7.62E-01 | > 0.99 |
| mmu-miR-200c-3p | -1.09 | 7.64E-01 | > 0.99 |
| mmu-miR-1927    | 1.09  | 7.64E-01 | > 0.99 |

|                  |       |          |        |
|------------------|-------|----------|--------|
| mmu-miR-381-3p   | -1.13 | 7.66E-01 | > 0.99 |
| mmu-miR-30c-2-3p | 1.15  | 7.66E-01 | > 0.99 |
| mmu-miR-1306-3p  | -1.20 | 7.69E-01 | > 0.99 |
| mmu-miR-136-5p   | 1.14  | 7.76E-01 | > 0.99 |
| mmu-miR-192-5p   | -1.09 | 7.77E-01 | > 0.99 |
| mmu-miR-466f-5p  | 1.13  | 7.77E-01 | > 0.99 |
| mmu-miR-144-3p   | 1.12  | 7.79E-01 | > 0.99 |
| mmu-miR-301a-3p  | 1.10  | 7.79E-01 | > 0.99 |
| mmu-miR-335-3p   | -1.10 | 7.80E-01 | > 0.99 |
| mmu-miR-1982-5p  | -1.15 | 7.80E-01 | > 0.99 |
| mmu-miR-541-5p   | -1.08 | 7.82E-01 | > 0.99 |
| mmu-miR-122-5p   | -1.17 | 7.83E-01 | > 0.99 |
| mmu-let-7i-3p    | -1.10 | 7.86E-01 | > 0.99 |
| mmu-miR-423-3p   | -1.07 | 7.86E-01 | > 0.99 |
| mmu-miR-20b-5p   | 1.19  | 7.89E-01 | > 0.99 |
| mmu-miR-149-5p   | -1.11 | 7.90E-01 | > 0.99 |
| mmu-miR-467h     | -1.14 | 7.94E-01 | > 0.99 |
| mmu-miR-495-3p   | -1.07 | 7.97E-01 | > 0.99 |
| mmu-miR-25-3p    | -1.07 | 8.00E-01 | > 0.99 |
| mmu-miR-99b-5p   | -1.09 | 8.02E-01 | > 0.99 |
| mmu-miR-335-5p   | -1.10 | 8.02E-01 | > 0.99 |
| mmu-miR-99b-3p   | -1.19 | 8.04E-01 | > 0.99 |
| mmu-miR-674-5p   | -1.08 | 8.05E-01 | > 0.99 |
| mmu-miR-682      | -1.17 | 8.07E-01 | > 0.99 |
| mmu-miR-101a-3p  | -1.08 | 8.08E-01 | > 0.99 |
| mmu-miR-193b-3p  | 1.06  | 8.14E-01 | > 0.99 |
| mmu-miR-1196-5p  | 1.10  | 8.16E-01 | > 0.99 |
| mmu-miR-376c-5p  | -1.20 | 8.17E-01 | > 0.99 |
| mmu-let-7e-5p    | 1.08  | 8.17E-01 | > 0.99 |
| mmu-miR-154-3p   | -1.10 | 8.18E-01 | > 0.99 |
| mmu-miR-30a-5p   | -1.08 | 8.19E-01 | > 0.99 |
| mmu-miR-195a-5p  | -1.09 | 8.20E-01 | > 0.99 |
| mmu-miR-671-5p   | -1.06 | 8.22E-01 | > 0.99 |
| mmu-miR-222-3p   | -1.08 | 8.22E-01 | > 0.99 |
| mmu-let-7a-1-3p  | 1.07  | 8.22E-01 | > 0.99 |
| mmu-miR-466f-3p  | 1.09  | 8.26E-01 | > 0.99 |
| mmu-miR-615-3p   | -1.17 | 8.27E-01 | > 0.99 |
| mmu-miR-540-5p   | 1.11  | 8.29E-01 | > 0.99 |
| mmu-miR-669n     | -1.07 | 8.29E-01 | > 0.99 |
| mmu-miR-188-5p   | 1.13  | 8.30E-01 | > 0.99 |
| mmu-miR-100-5p   | -1.06 | 8.36E-01 | > 0.99 |
| mmu-miR-409-5p   | -1.16 | 8.38E-01 | > 0.99 |
| mmu-miR-21a-5p   | -1.07 | 8.40E-01 | > 0.99 |
| mmu-miR-339-3p   | 1.06  | 8.45E-01 | > 0.99 |
| mmu-miR-186-3p   | 1.06  | 8.45E-01 | > 0.99 |
| mmu-miR-93-3p    | -1.08 | 8.48E-01 | > 0.99 |

|                  |       |          |        |
|------------------|-------|----------|--------|
| mmu-miR-133a-5p  | 1.11  | 8.54E-01 | > 0.99 |
| mmu-let-7i-5p    | 1.06  | 8.56E-01 | > 0.99 |
| mmu-miR-1946a    | 1.05  | 8.57E-01 | > 0.99 |
| mmu-miR-21a-3p   | -1.04 | 8.58E-01 | > 0.99 |
| mmu-miR-24-3p    | -1.06 | 8.59E-01 | > 0.99 |
| mmu-miR-497-5p   | -1.05 | 8.60E-01 | > 0.99 |
| mmu-miR-1895     | -1.05 | 8.60E-01 | > 0.99 |
| mmu-miR-125a-3p  | 1.06  | 8.61E-01 | > 0.99 |
| mmu-miR-466a-3p  | 1.09  | 8.62E-01 | > 0.99 |
| mmu-miR-221-3p   | -1.04 | 8.64E-01 | > 0.99 |
| mmu-miR-542-5p   | -1.06 | 8.66E-01 | > 0.99 |
| mmu-miR-467b-3p  | -1.07 | 8.69E-01 | > 0.99 |
| mmu-miR-107-3p   | 1.05  | 8.70E-01 | > 0.99 |
| mmu-miR-154-5p   | -1.05 | 8.72E-01 | > 0.99 |
| mmu-miR-99a-5p   | -1.06 | 8.73E-01 | > 0.99 |
| mmu-miR-532-3p   | -1.05 | 8.73E-01 | > 0.99 |
| mmu-miR-193a-3p  | 1.09  | 8.74E-01 | > 0.99 |
| mmu-miR-192-3p   | -1.05 | 8.80E-01 | > 0.99 |
| mmu-miR-32-5p    | 1.05  | 8.81E-01 | > 0.99 |
| mmu-miR-146b-5p  | 1.04  | 8.81E-01 | > 0.99 |
| mmu-miR-429-3p   | 1.05  | 8.82E-01 | > 0.99 |
| mmu-miR-455-5p   | 1.05  | 8.84E-01 | > 0.99 |
| mmu-miR-106b-5p  | 1.05  | 8.84E-01 | > 0.99 |
| mmu-miR-204-5p   | -1.06 | 8.84E-01 | > 0.99 |
| mmu-miR-421-3p   | -1.05 | 8.85E-01 | > 0.99 |
| mmu-miR-17-3p    | -1.03 | 8.85E-01 | > 0.99 |
| mmu-miR-23a-3p   | -1.05 | 8.86E-01 | > 0.99 |
| mmu-miR-324-3p   | -1.04 | 8.86E-01 | > 0.99 |
| mmu-miR-223-3p   | -1.04 | 8.87E-01 | > 0.99 |
| mmu-miR-674-3p   | -1.05 | 8.87E-01 | > 0.99 |
| mmu-miR-128-3p   | -1.05 | 8.88E-01 | > 0.99 |
| mmu-miR-194-2-3p | -1.03 | 8.88E-01 | > 0.99 |
| mmu-let-7f-5p    | -1.04 | 8.90E-01 | > 0.99 |
| mmu-miR-27b-3p   | -1.05 | 8.93E-01 | > 0.99 |
| mmu-let-7d-5p    | -1.04 | 8.96E-01 | > 0.99 |
| mmu-miR-487b-3p  | -1.08 | 8.96E-01 | > 0.99 |
| mmu-miR-34c-5p   | 1.03  | 9.00E-01 | > 0.99 |
| mmu-miR-28a-5p   | -1.04 | 9.00E-01 | > 0.99 |
| mmu-miR-410-3p   | -1.04 | 9.02E-01 | > 0.99 |
| mmu-miR-451a     | 1.04  | 9.06E-01 | > 0.99 |
| mmu-miR-300-5p   | 1.06  | 9.07E-01 | > 0.99 |
| mmu-miR-431-5p   | 1.05  | 9.07E-01 | > 0.99 |
| mmu-miR-379-3p   | 1.04  | 9.08E-01 | > 0.99 |
| mmu-miR-670-5p   | -1.06 | 9.09E-01 | > 0.99 |
| mmu-miR-106a-5p  | 1.04  | 9.09E-01 | > 0.99 |
| mmu-miR-10a-3p   | -1.06 | 9.12E-01 | > 0.99 |



|                  |       |          |        |
|------------------|-------|----------|--------|
| mmu-miR-490-3p   | -1.03 | 9.17E-01 | > 0.99 |
| mmu-miR-324-5p   | 1.04  | 9.17E-01 | > 0.99 |
| mmu-miR-770-5p   | -1.05 | 9.19E-01 | > 0.99 |
| mmu-miR-872-3p   | 1.04  | 9.20E-01 | > 0.99 |
| mmu-miR-345-5p   | 1.03  | 9.24E-01 | > 0.99 |
| mmu-miR-345-3p   | 1.05  | 9.25E-01 | > 0.99 |
| mmu-miR-708-5p   | 1.04  | 9.26E-01 | > 0.99 |
| mmu-miR-450b-3p  | 1.06  | 9.26E-01 | > 0.99 |
| mmu-miR-532-5p   | 1.03  | 9.29E-01 | > 0.99 |
| mmu-miR-1a-3p    | -1.03 | 9.32E-01 | > 0.99 |
| mmu-miR-669a-5p  | -1.05 | 9.34E-01 | > 0.99 |
| mmu-miR-20b-3p   | -1.06 | 9.36E-01 | > 0.99 |
| mmu-miR-129-1-3p | 1.04  | 9.37E-01 | > 0.99 |
| mmu-miR-9-5p     | 1.03  | 9.40E-01 | > 0.99 |
| mmu-miR-185-5p   | -1.03 | 9.41E-01 | > 0.99 |
| mmu-miR-148b-3p  | -1.02 | 9.43E-01 | > 0.99 |
| mmu-let-7b-3p    | 1.03  | 9.49E-01 | > 0.99 |
| mmu-miR-361-5p   | 1.02  | 9.50E-01 | > 0.99 |
| mmu-miR-19b-3p   | 1.02  | 9.51E-01 | > 0.99 |
| mmu-miR-22-3p    | -1.02 | 9.52E-01 | > 0.99 |
| mmu-miR-877-5p   | -1.06 | 9.53E-01 | > 0.99 |
| mmu-miR-134-5p   | -1.03 | 9.53E-01 | > 0.99 |
| mmu-miR-126-3p   | -1.02 | 9.53E-01 | > 0.99 |
| mmu-miR-130b-3p  | 1.02  | 9.56E-01 | > 0.99 |
| mmu-miR-467e-5p  | -1.03 | 9.57E-01 | > 0.99 |
| mmu-miR-152-3p   | -1.02 | 9.57E-01 | > 0.99 |
| mmu-miR-15b-3p   | -1.02 | 9.57E-01 | > 0.99 |

|                  |       |          |        |
|------------------|-------|----------|--------|
| mmu-miR-337-3p   | 1.03  | 9.59E-01 | > 0.99 |
| mmu-miR-363-3p   | -1.03 | 9.59E-01 | > 0.99 |
| mmu-miR-141-5p   | -1.02 | 9.60E-01 | > 0.99 |
| mmu-miR-592-5p   | 1.03  | 9.60E-01 | > 0.99 |
| mmu-miR-93-5p    | 1.02  | 9.60E-01 | > 0.99 |
| mmu-miR-143-3p   | 1.02  | 9.61E-01 | > 0.99 |
| mmu-miR-98-5p    | 1.01  | 9.62E-01 | > 0.99 |
| mmu-miR-148a-3p  | 1.02  | 9.63E-01 | > 0.99 |
| mmu-miR-30a-3p   | 1.01  | 9.64E-01 | > 0.99 |
| mmu-miR-186-5p   | 1.01  | 9.64E-01 | > 0.99 |
| mmu-miR-101b-3p  | 1.01  | 9.66E-01 | > 0.99 |
| mmu-miR-328-3p   | -1.01 | 9.71E-01 | > 0.99 |
| mmu-miR-501-5p   | 1.02  | 9.74E-01 | > 0.99 |
| mmu-miR-467a-5p  | 1.01  | 9.74E-01 | > 0.99 |
| mmu-miR-467d-5p  | 1.01  | 9.76E-01 | > 0.99 |
| mmu-miR-758-3p   | -1.01 | 9.78E-01 | > 0.99 |
| mmu-miR-218-5p   | 1.01  | 9.79E-01 | > 0.99 |
| mmu-miR-103-3p   | 1.01  | 9.80E-01 | > 0.99 |
| mmu-miR-299a-3p  | -1.01 | 9.81E-01 | > 0.99 |
| mmu-miR-103-2-5p | -1.01 | 9.83E-01 | > 0.99 |
| mmu-let-7f-1-3p  | 1.01  | 9.83E-01 | > 0.99 |
| mmu-miR-219-5p   | -1.01 | 9.86E-01 | > 0.99 |
| mmu-miR-1968-5p  | 1.01  | 9.90E-01 | > 0.99 |
| mmu-miR-23b-3p   | -1.00 | 9.90E-01 | > 0.99 |
| mmu-miR-467d-3p  | 1.00  | > 0.99   | > 0.99 |
| mmu-miR-342-5p   | 1.00  | > 0.99   | > 0.99 |
| mmu-miR-22-5p    | 1.00  | > 0.99   | > 0.99 |

**Supplementary Table 3.** Intestinal miRNAs altered in the 20 weeks study. miRNAs differentially expressed after the consumption of a high-fat diet (HFD) for 20 weeks, in male C57BL/6 mice. <sup>a</sup> In bold, microRNAs with significant change, unpaired T-test,  $p < 0.05$ . <sup>b</sup> 20 weeks HFD vs. control. <sup>c</sup> Benjamini and Hochberg corrected values.

| miRNA <sup>a</sup>     | Fold Change <sup>b</sup> | P-value  | P (Benjamini-Hochberg) <sup>c</sup> |
|------------------------|--------------------------|----------|-------------------------------------|
| mmu-let-7i             | -2.24                    | 8.40E-07 | 1.18E-02                            |
| <b>mmu-miR-542-5p</b>  | -2.55                    | 1.27E-05 | 1.24E-02                            |
| <b>mmu-miR-21</b>      | -2.46                    | 1.49E-05 | 1.24E-02                            |
| <b>mmu-miR-154</b>     | -2.73                    | 1.77E-05 | 1.24E-02                            |
| <b>mmu-miR-1897-5p</b> | 7.63                     | 3.87E-05 | 1.25E-02                            |
| <b>mmu-miR-23a</b>     | -1.90                    | 4.22E-05 | 1.27E-02                            |
| <b>mmu-miR-133a</b>    | -2.75                    | 5.49E-05 | 1.27E-02                            |
| <b>mmu-miR-598</b>     | -2.50                    | 6.01E-05 | 1.30E-02                            |
| <b>mmu-miR-133b</b>    | -2.62                    | 7.40E-05 | 1.30E-02                            |
| <b>mmu-miR-9</b>       | -2.65                    | 8.73E-05 | 1.35E-02                            |
| <b>mmu-miR-199a-3p</b> | -2.25                    | 9.89E-05 | 1.45E-02                            |
| <b>mmu-miR-143</b>     | -2.11                    | 9.92E-05 | 1.45E-02                            |
| <b>mmu-miR-103</b>     | 1.67                     | 1.47E-04 | 1.45E-02                            |
| <b>mmu-miR-425</b>     | -2.00                    | 1.48E-04 | 1.45E-02                            |
| <b>mmu-miR-130b</b>    | -3.18                    | 1.70E-04 | 1.53E-02                            |
| <b>mmu-miR-486</b>     | -4.57                    | 1.78E-04 | 1.53E-02                            |
| <b>mmu-miR-23a*</b>    | -2.49                    | 2.18E-04 | 1.53E-02                            |
| <b>mmu-miR-27b</b>     | -1.96                    | 2.21E-04 | 1.53E-02                            |
| <b>mmu-miR-136</b>     | -2.80                    | 2.22E-04 | 1.54E-02                            |
| <b>mmu-miR-140*</b>    | -1.67                    | 2.57E-04 | 1.54E-02                            |
| <b>mmu-miR-148b</b>    | -1.94                    | 2.63E-04 | 1.59E-02                            |
| <b>mmu-miR-384-5p</b>  | -4.26                    | 2.64E-04 | 1.59E-02                            |
| <b>mmu-miR-146a</b>    | -2.60                    | 2.67E-04 | 1.65E-02                            |
| <b>mmu-miR-449c</b>    | 11.05                    | 3.05E-04 | 1.68E-02                            |
| <b>mmu-miR-342-5p</b>  | -2.07                    | 3.15E-04 | 1.68E-02                            |
| <b>mmu-miR-1894-5p</b> | -3.90                    | 3.18E-04 | 1.70E-02                            |
| <b>mmu-miR-217</b>     | -3.76                    | 3.24E-04 | 1.82E-02                            |
| <b>mmu-miR-26b</b>     | -3.19                    | 3.30E-04 | 1.82E-02                            |
| <b>mmu-miR-185</b>     | -2.51                    | 3.62E-04 | 1.82E-02                            |
| <b>mmu-miR-26a</b>     | -2.75                    | 3.65E-04 | 1.84E-02                            |
| <b>mmu-miR-1</b>       | -2.67                    | 3.67E-04 | 1.85E-02                            |
| <b>mmu-miR-29b</b>     | -2.28                    | 3.88E-04 | 1.87E-02                            |
| <b>mmu-miR-151-3p</b>  | -2.03                    | 4.10E-04 | 1.93E-02                            |
| <b>mmu-miR-147</b>     | -3.60                    | 4.39E-04 | 2.15E-02                            |
| <b>mmu-miR-16</b>      | -2.79                    | 5.09E-04 | 2.24E-02                            |
| <b>mmu-miR-15a</b>     | -1.99                    | 5.78E-04 | 2.46E-02                            |
| <b>mmu-miR-127</b>     | -3.79                    | 5.79E-04 | 2.46E-02                            |
| <b>mmu-miR-125b-5p</b> | -2.17                    | 5.92E-04 | 2.49E-02                            |
| <b>mmu-miR-669e</b>    | 5.84                     | 6.06E-04 | 2.51E-02                            |
| <b>mmu-miR-191</b>     | -1.68                    | 6.47E-04 | 2.62E-02                            |

|                        |       |          |          |
|------------------------|-------|----------|----------|
| <b>mmu-miR-7b</b>      | -2.41 | 6.86E-04 | 2.69E-02 |
| <b>mmu-miR-181a</b>    | -2.26 | 7.63E-04 | 2.69E-02 |
| <b>mmu-miR-145</b>     | -2.26 | 7.64E-04 | 2.72E-02 |
| <b>mmu-miR-138</b>     | -2.35 | 7.98E-04 | 2.75E-02 |
| <b>mmu-miR-1894-3p</b> | 2.54  | 7.99E-04 | 2.75E-02 |
| mmu-miR-467e           | -2.45 | 1.12E-03 | 2.75E-02 |
| mmu-miR-22             | -1.87 | 1.12E-03 | 2.75E-02 |
| mmu-miR-33             | -3.67 | 1.16E-03 | 2.75E-02 |
| mmu-miR-27a            | -1.99 | 1.20E-03 | 2.77E-02 |
| mmu-miR-411            | -2.51 | 1.29E-03 | 2.80E-02 |
| mmu-miR-337-3p         | -3.84 | 1.34E-03 | 2.80E-02 |
| mmu-miR-363-3p         | -2.18 | 1.35E-03 | 2.89E-02 |
| mmu-miR-10a            | -2.17 | 1.47E-03 | 2.89E-02 |
| mmu-miR-29c            | -1.71 | 1.48E-03 | 2.95E-02 |
| mmu-miR-666-3p         | -3.26 | 1.50E-03 | 2.97E-02 |
| mmu-miR-183            | -2.20 | 1.50E-03 | 2.98E-02 |
| mmu-miR-503            | -3.36 | 1.51E-03 | 2.98E-02 |
| mmu-miR-96             | -2.14 | 1.62E-03 | 2.98E-02 |
| mmu-miR-29a*           | -1.67 | 1.65E-03 | 2.98E-02 |
| mmu-miR-142-5p         | -3.24 | 1.69E-03 | 2.98E-02 |
| mmu-miR-125a-5p        | -1.93 | 1.76E-03 | 3.05E-02 |
| mmu-miR-369-5p         | -1.67 | 1.77E-03 | 3.08E-02 |
| mmu-let-7c             | -1.65 | 1.86E-03 | 3.15E-02 |
| mmu-miR-148a           | -2.09 | 1.87E-03 | 3.15E-02 |
| mmu-miR-20b            | -5.04 | 1.96E-03 | 3.15E-02 |
| mmu-miR-322            | -2.25 | 2.20E-03 | 3.15E-02 |
| mmu-miR-301b           | -2.04 | 2.21E-03 | 3.18E-02 |
| mmu-miR-106a           | -1.92 | 2.22E-03 | 3.19E-02 |
| mmu-miR-31*            | 1.62  | 2.23E-03 | 3.20E-02 |
| mmu-miR-30c            | -1.67 | 2.39E-03 | 3.29E-02 |
| mmu-miR-1966           | 3.89  | 2.42E-03 | 3.40E-02 |
| mmu-miR-467a           | -2.32 | 2.45E-03 | 3.40E-02 |
| mmu-miR-144            | -5.23 | 2.47E-03 | 3.41E-02 |
| mmu-let-7e             | -2.04 | 2.53E-03 | 3.47E-02 |
| mmu-miR-142-3p         | -2.63 | 2.55E-03 | 3.47E-02 |
| mmu-miR-704            | -2.41 | 2.67E-03 | 3.47E-02 |
| mmu-miR-101b           | -1.97 | 2.70E-03 | 3.47E-02 |
| mmu-miR-1947           | -4.05 | 2.84E-03 | 3.47E-02 |
| mmu-miR-362-3p         | -1.75 | 2.94E-03 | 3.47E-02 |
| mmu-miR-130a           | -1.83 | 2.96E-03 | 3.47E-02 |
| mmu-miR-1968           | 3.99  | 3.02E-03 | 3.47E-02 |

|                 |       |          |          |
|-----------------|-------|----------|----------|
| mmu-miR-92b     | -3.51 | 3.29E-03 | 3.59E-02 |
| mmu-miR-190     | -2.01 | 3.32E-03 | 3.63E-02 |
| mmu-miR-326     | -1.82 | 3.35E-03 | 3.64E-02 |
| mmu-miR-350     | -2.23 | 3.42E-03 | 3.67E-02 |
| mmu-miR-101a    | -1.69 | 3.49E-03 | 3.74E-02 |
| mmu-miR-24      | -1.83 | 3.56E-03 | 3.74E-02 |
| mmu-miR-339-3p  | -4.24 | 3.70E-03 | 3.82E-02 |
| mmu-miR-449a    | -2.47 | 4.18E-03 | 3.94E-02 |
| mmu-miR-377     | -4.33 | 4.93E-03 | 3.97E-02 |
| mmu-miR-139-3p  | -2.59 | 4.94E-03 | 3.99E-02 |
| mmu-miR-99b     | -1.85 | 5.05E-03 | 3.99E-02 |
| mmu-miR-374     | -1.87 | 5.12E-03 | 3.99E-02 |
| mmu-miR-182     | -1.84 | 5.64E-03 | 3.99E-02 |
| mmu-miR-107     | -1.58 | 5.67E-03 | 3.99E-02 |
| mmu-miR-497     | -1.63 | 5.78E-03 | 4.02E-02 |
| mmu-miR-345-3p  | 3.11  | 5.95E-03 | 4.03E-02 |
| mmu-miR-466j    | 2.27  | 5.96E-03 | 4.03E-02 |
| mmu-miR-467b    | -2.52 | 6.10E-03 | 4.23E-02 |
| mmu-miR-99a     | -2.57 | 6.12E-03 | 4.23E-02 |
| mmu-miR-93*     | -2.16 | 6.23E-03 | 4.46E-02 |
| mmu-miR-501-3p  | -1.94 | 6.36E-03 | 4.50E-02 |
| mmu-miR-19b     | -1.69 | 6.41E-03 | 4.52E-02 |
| mmu-miR-1898    | 4.40  | 6.71E-03 | 4.52E-02 |
| mmu-miR-15b     | -1.94 | 6.72E-03 | 4.52E-02 |
| mmu-miR-488     | -4.23 | 6.93E-03 | 4.52E-02 |
| mmu-miR-17      | -1.85 | 7.02E-03 | 4.53E-02 |
| mmu-miR-200a    | -1.57 | 7.11E-03 | 4.68E-02 |
| mmu-miR-543     | -5.57 | 7.30E-03 | 4.68E-02 |
| mmu-miR-221     | -1.59 | 7.33E-03 | 4.69E-02 |
| mmu-miR-199a-5p | -1.62 | 7.37E-03 | 4.79E-02 |
| mmu-miR-674     | 1.53  | 7.59E-03 | 4.96E-02 |
| mmu-miR-376b    | -3.53 | 7.72E-03 | 5.02E-02 |
| mmu-miR-339-5p  | -1.68 | 7.96E-03 | 5.08E-02 |
| mmu-miR-140     | -2.13 | 8.09E-03 | 5.10E-02 |
| mmu-miR-369-3p  | -2.48 | 8.16E-03 | 5.10E-02 |
| mmu-miR-145*    | -1.80 | 8.30E-03 | 5.22E-02 |
| mmu-miR-195     | -1.71 | 8.40E-03 | 5.22E-02 |
| mmu-miR-1306    | -2.21 | 8.48E-03 | 5.28E-02 |
| mmu-miR-124     | -2.20 | 8.78E-03 | 5.35E-02 |
| mmu-miR-450b-5p | -2.79 | 9.19E-03 | 5.37E-02 |
| mmu-miR-219-5p  | -2.07 | 9.22E-03 | 5.37E-02 |
| mmu-miR-30d     | -1.73 | 9.31E-03 | 5.40E-02 |
| mmu-miR-192     | -1.59 | 9.60E-03 | 5.48E-02 |
| mmu-miR-214     | -1.88 | 9.70E-03 | 5.71E-02 |
| mmu-miR-330     | -2.34 | 9.80E-03 | 5.74E-02 |
| mmu-miR-200b    | -1.69 | 9.80E-03 | 5.74E-02 |

|                 |       |          |          |
|-----------------|-------|----------|----------|
| mmu-miR-181c    | -2.10 | 9.96E-03 | 5.91E-02 |
| mmu-miR-299     | -2.04 | 1.00E-02 | 5.91E-02 |
| mmu-miR-139-5p  | -1.63 | 1.05E-02 | 5.97E-02 |
| mmu-miR-186     | -1.82 | 1.07E-02 | 5.98E-02 |
| mmu-miR-324-5p  | -1.87 | 1.08E-02 | 5.98E-02 |
| mmu-miR-325     | -1.84 | 1.09E-02 | 6.32E-02 |
| mmu-miR-153     | -4.80 | 1.12E-02 | 6.36E-02 |
| mmu-miR-193     | -2.46 | 1.13E-02 | 6.38E-02 |
| mmu-miR-1895    | 2.56  | 1.16E-02 | 6.57E-02 |
| mmu-miR-328     | -2.00 | 1.20E-02 | 6.57E-02 |
| mmu-miR-126-3p  | -1.39 | 1.22E-02 | 6.69E-02 |
| mmu-miR-223     | -1.91 | 1.25E-02 | 6.70E-02 |
| mmu-miR-138-1*  | -1.68 | 1.25E-02 | 6.70E-02 |
| mmu-miR-1946a   | 2.40  | 1.26E-02 | 6.92E-02 |
| mmu-miR-338-5p  | -2.87 | 1.26E-02 | 7.01E-02 |
| mmu-miR-708     | -3.02 | 1.27E-02 | 7.39E-02 |
| mmu-miR-434-3p  | -2.19 | 1.29E-02 | 7.40E-02 |
| mmu-miR-351     | -2.38 | 1.30E-02 | 7.44E-02 |
| mmu-miR-137     | -1.77 | 1.30E-02 | 7.49E-02 |
| mmu-miR-335-5p  | -2.53 | 1.38E-02 | 7.51E-02 |
| mmu-miR-380-3p  | -2.58 | 1.39E-02 | 7.53E-02 |
| mmu-miR-674*    | 1.58  | 1.47E-02 | 7.60E-02 |
| mmu-miR-100     | -2.75 | 1.50E-02 | 7.74E-02 |
| mmu-miR-669a-5p | -3.61 | 1.51E-02 | 7.85E-02 |
| mmu-miR-23b     | -1.53 | 1.52E-02 | 7.85E-02 |
| mmu-miR-1907    | 2.46  | 1.54E-02 | 8.04E-02 |
| mmu-miR-423-3p  | -1.70 | 1.55E-02 | 8.43E-02 |
| mmu-miR-299*    | -2.48 | 1.61E-02 | 8.51E-02 |
| mmu-miR-592     | -2.84 | 1.62E-02 | 8.68E-02 |
| mmu-miR-93      | -1.61 | 1.63E-02 | 8.86E-02 |
| mmu-miR-149     | -2.22 | 1.68E-02 | 8.86E-02 |
| mmu-let-7f      | -2.19 | 1.75E-02 | 9.15E-02 |
| mmu-miR-345-5p  | -1.90 | 1.81E-02 | 9.27E-02 |
| mmu-miR-193b    | -2.58 | 1.83E-02 | 9.27E-02 |
| mmu-miR-188-5p  | -2.04 | 1.84E-02 | 9.37E-02 |
| mmu-miR-19a     | -1.79 | 1.89E-02 | 9.37E-02 |
| mmu-miR-218     | -1.44 | 1.90E-02 | 1.01E-01 |
| mmu-miR-1196    | 3.21  | 1.93E-02 | 1.02E-01 |
| mmu-miR-301a    | -3.89 | 1.97E-02 | 1.03E-01 |
| mmu-miR-181b    | -2.00 | 2.00E-02 | 1.05E-01 |
| mmu-let-7b      | -1.45 | 2.00E-02 | 1.06E-01 |
| mmu-miR-874     | -2.04 | 2.02E-02 | 1.09E-01 |
| mmu-miR-27a*    | -1.85 | 2.16E-02 | 1.10E-01 |
| mmu-miR-324-3p  | -1.75 | 2.19E-02 | 1.10E-01 |
| mmu-miR-296-5p  | -3.51 | 2.20E-02 | 1.10E-01 |
| mmu-miR-467c    | -3.24 | 2.28E-02 | 1.12E-01 |

|                 |       |          |          |
|-----------------|-------|----------|----------|
| mmu-miR-106b    | -1.51 | 2.32E-02 | 1.12E-01 |
| mmu-miR-9*      | -2.06 | 2.35E-02 | 1.12E-01 |
| mmu-miR-18a     | -1.59 | 2.50E-02 | 1.12E-01 |
| mmu-miR-200c    | -1.39 | 2.52E-02 | 1.14E-01 |
| mmu-miR-127*    | -2.44 | 2.54E-02 | 1.14E-01 |
| mmu-miR-760-3p  | -3.10 | 2.64E-02 | 1.15E-01 |
| mmu-miR-30b     | -1.56 | 2.65E-02 | 1.18E-01 |
| mmu-miR-450a    | -3.73 | 2.71E-02 | 1.19E-01 |
| mmu-miR-330*    | 2.30  | 2.74E-02 | 1.19E-01 |
| mmu-miR-106b*   | 1.30  | 2.84E-02 | 1.21E-01 |
| mmu-miR-468     | 2.13  | 2.90E-02 | 1.22E-01 |
| mmu-miR-466a-3p | -4.06 | 3.07E-02 | 1.26E-01 |
| mmu-miR-101a*   | -1.29 | 3.08E-02 | 1.26E-01 |
| mmu-miR-365     | -1.82 | 3.12E-02 | 1.26E-01 |
| mmu-miR-150     | -2.39 | 3.16E-02 | 1.28E-01 |
| mmu-miR-141     | -1.51 | 3.18E-02 | 1.28E-01 |
| mmu-miR-434-5p  | -1.84 | 3.20E-02 | 1.29E-01 |
| mmu-miR-152     | -1.49 | 3.32E-02 | 1.33E-01 |
| mmu-miR-652     | -1.68 | 3.38E-02 | 1.34E-01 |
| mmu-miR-132     | -1.29 | 3.40E-02 | 1.34E-01 |
| mmu-miR-877     | -1.73 | 3.50E-02 | 1.34E-01 |
| mmu-miR-342-3p  | -1.49 | 3.69E-02 | 1.34E-01 |
| mmu-miR-715     | 2.24  | 3.74E-02 | 1.38E-01 |
| mmu-miR-18a*    | -1.85 | 3.83E-02 | 1.38E-01 |
| mmu-miR-204     | -1.89 | 3.94E-02 | 1.38E-01 |
| mmu-miR-362-5p  | -1.77 | 3.95E-02 | 1.39E-01 |
| mmu-miR-451     | -3.75 | 4.10E-02 | 1.39E-01 |
| mmu-miR-29a     | -1.70 | 4.17E-02 | 1.39E-01 |
| mmu-miR-455*    | -5.57 | 4.19E-02 | 1.44E-01 |
| mmu-miR-1949    | 1.25  | 4.26E-02 | 1.45E-01 |
| mmu-miR-184     | -1.50 | 4.27E-02 | 1.46E-01 |
| mmu-miR-99b*    | 1.59  | 4.60E-02 | 1.48E-01 |
| mmu-miR-20a*    | -2.22 | 4.69E-02 | 1.49E-01 |
| mmu-miR-484     | -1.42 | 4.77E-02 | 1.50E-01 |
| mmu-miR-29c*    | -1.62 | 5.09E-02 | 1.52E-01 |
| mmu-miR-762     | 1.89  | 5.19E-02 | 1.56E-01 |
| mmu-miR-125a-3p | -2.44 | 5.23E-02 | 1.60E-01 |
| mmu-miR-129-5p  | -2.01 | 5.36E-02 | 1.61E-01 |
| mmu-miR-1900    | 1.34  | 5.36E-02 | 1.64E-01 |
| mmu-miR-466f    | 2.52  | 5.39E-02 | 1.66E-01 |
| mmu-miR-710     | -1.74 | 5.41E-02 | 1.66E-01 |
| mmu-miR-669b    | 2.09  | 5.50E-02 | 1.67E-01 |
| mmu-miR-181d    | -2.44 | 5.55E-02 | 1.71E-01 |
| mmu-let-7d*     | 1.35  | 5.77E-02 | 1.71E-01 |
| mmu-miR-582-5p  | -1.38 | 5.85E-02 | 1.71E-01 |
| mmu-miR-1959    | -1.64 | 5.89E-02 | 1.73E-01 |

|                 |        |          |          |
|-----------------|--------|----------|----------|
| mmu-miR-673-5p  | -2.49  | 6.08E-02 | 1.75E-01 |
| mmu-miR-203*    | -1.82  | 6.31E-02 | 1.75E-01 |
| mmu-miR-298     | -2.39  | 6.32E-02 | 1.79E-01 |
| mmu-miR-532-5p  | -1.56  | 6.47E-02 | 1.79E-01 |
| mmu-miR-155     | -2.00  | 6.56E-02 | 1.79E-01 |
| mmu-miR-212-3p  | -1.53  | 6.80E-02 | 1.81E-01 |
| mmu-miR-205     | -2.00  | 6.87E-02 | 1.85E-01 |
| mmu-miR-500     | -1.59  | 6.91E-02 | 1.87E-01 |
| mmu-miR-21*     | -1.42  | 6.94E-02 | 1.88E-01 |
| mmu-miR-744     | -1.68  | 6.99E-02 | 1.90E-01 |
| mmu-miR-615-3p  | -1.93  | 7.20E-02 | 1.95E-01 |
| mmu-let-7i*     | -1.38  | 7.26E-02 | 2.05E-01 |
| mmu-miR-187     | -1.99  | 7.28E-02 | 2.05E-01 |
| mmu-miR-296-3p  | 1.60   | 7.36E-02 | 2.06E-01 |
| mmu-miR-134     | 2.27   | 7.42E-02 | 2.14E-01 |
| mmu-miR-25      | -1.62  | 7.76E-02 | 2.16E-01 |
| mmu-miR-532-3p  | -1.36  | 7.84E-02 | 2.18E-01 |
| mmu-miR-34c     | -1.80  | 8.18E-02 | 2.19E-01 |
| mmu-miR-1930    | 1.67   | 8.33E-02 | 2.21E-01 |
| mmu-miR-1961    | 1.38   | 8.58E-02 | 2.23E-01 |
| mmu-miR-574-3p  | -1.54  | 8.79E-02 | 2.32E-01 |
| mmu-miR-425*    | -1.58  | 8.89E-02 | 2.37E-01 |
| mmu-let-7b*     | -1.76  | 9.27E-02 | 2.38E-01 |
| mmu-miR-340-3p  | -1.73  | 9.30E-02 | 2.38E-01 |
| mmu-miR-34b-5p  | -2.50  | 9.39E-02 | 2.38E-01 |
| mmu-miR-431     | -1.83  | 9.66E-02 | 2.39E-01 |
| mmu-miR-320     | -1.40  | 9.68E-02 | 2.42E-01 |
| mmu-miR-222     | -2.10  | 9.69E-02 | 2.44E-01 |
| mmu-miR-379     | -1.74  | 9.85E-02 | 2.46E-01 |
| mmu-miR-300     | -1.85  | 1.00E-01 | 2.51E-01 |
| mmu-miR-31      | -1.22  | 1.00E-01 | 2.53E-01 |
| mmu-miR-694     | -25.64 | 1.03E-01 | 2.53E-01 |
| mmu-miR-148a*   | 1.98   | 1.03E-01 | 2.53E-01 |
| mmu-miR-1982.1  | -2.03  | 1.03E-01 | 2.53E-01 |
| mmu-miR-382     | -1.88  | 1.05E-01 | 2.55E-01 |
| mmu-let-7g      | -1.34  | 1.08E-01 | 2.55E-01 |
| mmu-miR-340-5p  | -1.81  | 1.09E-01 | 2.67E-01 |
| mmu-miR-191     | 1.10   | 1.10E-01 | 2.69E-01 |
| mmu-miR-151-5p  | -1.86  | 1.12E-01 | 2.69E-01 |
| mmu-miR-32      | -1.54  | 1.16E-01 | 2.71E-01 |
| mmu-miR-20a     | -1.67  | 1.22E-01 | 2.71E-01 |
| mmu-miR-677     | 1.40   | 1.23E-01 | 2.72E-01 |
| mmu-miR-378     | -1.35  | 1.28E-01 | 2.77E-01 |
| mmu-miR-671-5p  | 1.84   | 1.30E-01 | 2.78E-01 |
| mmu-miR-450b-3p | -2.12  | 1.32E-01 | 2.78E-01 |
| mmu-miR-2137    | -1.99  | 1.32E-01 | 2.82E-01 |

|                 |       |          |          |
|-----------------|-------|----------|----------|
| mmu-miR-128     | -1.29 | 1.34E-01 | 2.82E-01 |
| mmu-miR-329     | -1.64 | 1.36E-01 | 2.89E-01 |
| mmu-miR-34a     | -1.33 | 1.42E-01 | 2.89E-01 |
| mmu-miR-26b*    | 1.32  | 1.47E-01 | 2.89E-01 |
| mmu-miR-1247    | 1.82  | 1.47E-01 | 2.89E-01 |
| mmu-miR-224     | -1.44 | 1.47E-01 | 2.91E-01 |
| mmu-miR-409-5p  | -1.87 | 1.49E-01 | 2.93E-01 |
| mmu-miR-1839-3p | 1.35  | 1.51E-01 | 2.94E-01 |
| mmu-miR-7a-1*   | -1.42 | 1.52E-01 | 2.96E-01 |
| mmu-miR-1981    | 2.21  | 1.55E-01 | 2.99E-01 |
| mmu-miR-1195    | 1.59  | 1.58E-01 | 3.03E-01 |
| mmu-miR-203     | -1.60 | 1.60E-01 | 3.13E-01 |
| mmu-miR-466k    | 1.79  | 1.61E-01 | 3.15E-01 |
| mmu-miR-361     | -1.44 | 1.61E-01 | 3.19E-01 |
| mmu-miR-146b    | -1.81 | 1.63E-01 | 3.21E-01 |
| mmu-miR-103-2*  | 1.70  | 1.63E-01 | 3.21E-01 |
| mmu-miR-194     | -1.25 | 1.72E-01 | 3.21E-01 |
| mmu-miR-542-3p  | 1.53  | 1.74E-01 | 3.26E-01 |
| mmu-miR-700     | 2.07  | 1.74E-01 | 3.39E-01 |
| mmu-miR-15b*    | -1.49 | 1.76E-01 | 3.42E-01 |
| mmu-miR-214*    | -1.39 | 1.77E-01 | 3.43E-01 |
| mmu-miR-455     | -1.40 | 1.78E-01 | 3.43E-01 |
| mmu-miR-337-5p  | -1.43 | 1.82E-01 | 3.45E-01 |
| mmu-let-7d      | -1.36 | 1.83E-01 | 3.48E-01 |
| mmu-miR-708*    | 1.43  | 1.84E-01 | 3.54E-01 |
| mmu-miR-667     | -1.70 | 1.87E-01 | 3.55E-01 |
| mmu-miR-30c-1*  | -2.33 | 1.87E-01 | 3.55E-01 |
| mmu-miR-186*    | -1.86 | 1.93E-01 | 3.60E-01 |
| mmu-miR-495     | -2.19 | 1.93E-01 | 3.60E-01 |
| mmu-miR-322*    | -1.63 | 1.93E-01 | 3.60E-01 |
| mmu-miR-338-3p  | -1.32 | 1.94E-01 | 3.61E-01 |
| mmu-miR-490-5p  | -1.52 | 1.96E-01 | 3.63E-01 |
| mmu-miR-423-5p  | -1.21 | 2.01E-01 | 3.63E-01 |
| mmu-miR-30a     | -1.60 | 2.04E-01 | 3.70E-01 |
| mmu-miR-331-3p  | -1.54 | 2.07E-01 | 3.71E-01 |
| mmu-miR-742     | -1.83 | 2.17E-01 | 3.71E-01 |
| mmu-miR-804     | 1.40  | 2.20E-01 | 3.79E-01 |
| mmu-miR-195*    | -1.26 | 2.23E-01 | 3.79E-01 |
| mmu-miR-1964-3p | -2.46 | 2.24E-01 | 3.87E-01 |
| mmu-miR-467d    | -2.20 | 2.28E-01 | 4.16E-01 |
| mmu-miR-672     | -1.55 | 2.38E-01 | 4.22E-01 |
| mmu-miR-30e     | -1.37 | 2.40E-01 | 4.23E-01 |
| mmu-miR-1937c   | 1.84  | 2.42E-01 | 4.23E-01 |
| mmu-miR-30a*    | -1.23 | 2.42E-01 | 4.23E-01 |
| mmu-miR-466f-5p | -1.48 | 2.45E-01 | 4.26E-01 |
| mmu-miR-207     | -1.83 | 2.52E-01 | 4.29E-01 |

|                   |       |          |          |
|-------------------|-------|----------|----------|
| mmu-miR-1951      | 1.89  | 2.54E-01 | 4.31E-01 |
| mmu-miR-29b-1*    | -1.49 | 2.54E-01 | 4.31E-01 |
| mmu-miR-429       | -1.23 | 2.59E-01 | 4.33E-01 |
| mmu-let-7a-2*     | 1.27  | 2.59E-01 | 4.36E-01 |
| mmu-miR-22*       | -1.13 | 2.60E-01 | 4.40E-01 |
| mmu-miR-1957      | 1.47  | 2.62E-01 | 4.54E-01 |
| mmu-miR-376a      | -1.93 | 2.64E-01 | 4.64E-01 |
| mmu-miR-215       | -1.71 | 2.64E-01 | 4.65E-01 |
| mmu-miR-181a-1*   | 1.42  | 2.70E-01 | 4.71E-01 |
| mmu-miR-1937a     | 2.07  | 2.72E-01 | 4.73E-01 |
| mmu-miR-7a        | -1.15 | 2.73E-01 | 4.76E-01 |
| mmu-miR-297a      | -1.52 | 2.80E-01 | 4.86E-01 |
| mmu-miR-297b-3p   | -1.84 | 2.80E-01 | 4.86E-01 |
| mmu-let-7e*       | 1.56  | 2.87E-01 | 4.87E-01 |
| mmu-miR-28*       | -1.18 | 3.09E-01 | 4.87E-01 |
| mmu-miR-98        | -1.39 | 3.14E-01 | 4.98E-01 |
| mmu-miR-676       | -1.47 | 3.17E-01 | 5.10E-01 |
| mmu-miR-1937b     | 1.85  | 3.17E-01 | 5.12E-01 |
| mmu-miR-490-3p    | -1.46 | 3.21E-01 | 5.13E-01 |
| mmu-miR-381       | 5.10  | 3.24E-01 | 5.15E-01 |
| mmu-miR-706       | -1.18 | 3.28E-01 | 5.23E-01 |
| mmu-miR-744*      | 1.32  | 3.29E-01 | 5.23E-01 |
| mmu-miR-546       | -1.94 | 3.32E-01 | 5.24E-01 |
| mmu-miR-541       | -1.84 | 3.48E-01 | 5.25E-01 |
| mmu-miR-16-1*     | -1.36 | 3.57E-01 | 5.25E-01 |
| mmu-miR-467b*     | 1.31  | 3.58E-01 | 5.26E-01 |
| mmu-miR-2145      | -1.20 | 3.65E-01 | 5.26E-01 |
| mmu-miR-669i      | 1.23  | 3.79E-01 | 5.27E-01 |
| mmu-miR-18b       | -1.50 | 3.80E-01 | 5.33E-01 |
| mmu-miR-1274a     | 1.77  | 3.83E-01 | 5.36E-01 |
| mmu-miR-129-2-3p  | 1.18  | 3.83E-01 | 5.36E-01 |
| mmu-let-7f-2*     | -1.29 | 3.92E-01 | 5.36E-01 |
| mmu-miR-92a-2*    | 1.35  | 4.02E-01 | 5.42E-01 |
| mmu-miR-423-3p    | -1.10 | 4.05E-01 | 5.46E-01 |
| mmu-miR-200a*     | 1.06  | 4.10E-01 | 5.49E-01 |
| mmu-miR-1839-5p   | -1.16 | 4.18E-01 | 5.53E-01 |
| mmu-miR-375       | -1.36 | 4.18E-01 | 5.53E-01 |
| mmu-miR-125b-2-3p | 1.28  | 4.20E-01 | 5.53E-01 |
| mmu-let-7f-1*     | 1.22  | 4.22E-01 | 5.53E-01 |
| mmu-miR-28        | -1.26 | 4.23E-01 | 5.56E-01 |
| mmu-miR-1198-5p   | -1.21 | 4.25E-01 | 5.59E-01 |
| mmu-miR-191*      | 1.23  | 4.26E-01 | 5.63E-01 |
| mmu-miR-30d*      | -1.15 | 4.28E-01 | 5.63E-01 |
| mmu-miR-194-2*    | -1.11 | 4.33E-01 | 5.65E-01 |
| mmu-let-7a-1*     | -1.17 | 4.38E-01 | 5.69E-01 |
| mmu-miR-1934      | -1.29 | 4.40E-01 | 5.76E-01 |

|                 |       |          |          |
|-----------------|-------|----------|----------|
| mmu-miR-410     | -1.35 | 4.46E-01 | 5.78E-01 |
| mmu-miR-411*    | -1.39 | 4.50E-01 | 5.81E-01 |
| mmu-miR-200b*   | 1.13  | 4.59E-01 | 5.89E-01 |
| mmu-miR-466d-3p | -1.33 | 4.59E-01 | 5.93E-01 |
| mmu-miR-126-5p  | -1.13 | 4.60E-01 | 5.98E-01 |
| mmu-miR-200c*   | -1.28 | 4.62E-01 | 5.98E-01 |
| mmu-miR-291a-5p | -1.36 | 4.74E-01 | 6.01E-01 |
| mmu-miR-1935    | -1.47 | 4.74E-01 | 6.04E-01 |
| mmu-miR-709     | -2.72 | 4.77E-01 | 6.07E-01 |
| mmu-miR-669l    | 1.35  | 4.81E-01 | 6.13E-01 |
| mmu-miR-27b*    | -1.45 | 4.88E-01 | 6.15E-01 |
| mmu-miR-34b-3p  | -1.35 | 4.92E-01 | 6.15E-01 |
| mmu-miR-681     | 1.51  | 4.95E-01 | 6.22E-01 |
| mmu-miR-758     | -1.32 | 5.03E-01 | 6.23E-01 |
| mmu-miR-192*    | 1.04  | 5.08E-01 | 6.25E-01 |
| mmu-miR-1191    | -1.58 | 5.14E-01 | 6.28E-01 |
| mmu-miR-1939    | 1.23  | 5.14E-01 | 6.49E-01 |
| mmu-miR-501-5p  | 1.13  | 5.22E-01 | 6.49E-01 |
| mmu-miR-211     | -1.30 | 5.26E-01 | 6.67E-01 |
| mmu-miR-466h-5p | 1.29  | 5.33E-01 | 6.83E-01 |
| mmu-let-7g*     | 1.08  | 5.35E-01 | 6.83E-01 |
| mmu-miR-669d    | -1.53 | 5.36E-01 | 6.94E-01 |
| mmu-miR-297c    | -1.25 | 5.44E-01 | 6.96E-01 |
| mmu-miR-130b*   | -1.14 | 5.46E-01 | 6.97E-01 |
| mmu-miR-692     | -1.37 | 5.53E-01 | 7.01E-01 |
| mmu-miR-376c*   | -1.38 | 5.73E-01 | 7.01E-01 |
| mmu-miR-1983    | 1.25  | 5.75E-01 | 7.12E-01 |
| mmu-miR-582-3p  | 1.18  | 5.92E-01 | 7.12E-01 |
| mmu-miR-30e*    | 1.04  | 6.08E-01 | 7.22E-01 |
| mmu-miR-491     | -1.31 | 6.09E-01 | 7.27E-01 |
| mmu-miR-421     | -1.12 | 6.23E-01 | 7.29E-01 |
| mmu-miR-466f-3p | 1.20  | 6.25E-01 | 7.37E-01 |
| mmu-miR-467g    | -1.25 | 6.31E-01 | 7.44E-01 |
| mmu-miR-691     | 1.37  | 6.31E-01 | 7.49E-01 |
| mmu-miR-26a-1*  | 1.09  | 6.43E-01 | 7.49E-01 |
| mmu-miR-135a    | -1.21 | 6.44E-01 | 7.53E-01 |
| mmu-miR-210     | -1.09 | 6.55E-01 | 7.53E-01 |
| mmu-miR-212-5p  | 1.18  | 6.61E-01 | 7.53E-01 |
| mmu-miR-1944    | -1.08 | 6.73E-01 | 7.55E-01 |
| mmu-miR-1929    | 1.07  | 6.81E-01 | 7.92E-01 |
| mmu-miR-141*    | 1.05  | 6.86E-01 | 7.96E-01 |
| mmu-miR-409-3p  | 1.78  | 6.88E-01 | 8.00E-01 |
| mmu-miR-1982*   | 1.13  | 6.94E-01 | 8.00E-01 |
| mmu-let-7a      | -1.12 | 6.95E-01 | 8.12E-01 |
| mmu-miR-122     | -1.19 | 6.97E-01 | 8.31E-01 |
| mmu-miR-1186    | -1.28 | 7.00E-01 | 8.32E-01 |

|                 |       |          |          |
|-----------------|-------|----------|----------|
| mmu-miR-872*    | 1.06  | 7.36E-01 | 8.35E-01 |
| mmu-miR-19b-1*  | 1.17  | 7.48E-01 | 8.43E-01 |
| mmu-miR-379*    | -1.22 | 7.48E-01 | 8.60E-01 |
| mmu-miR-1249    | -1.07 | 7.61E-01 | 8.60E-01 |
| mmu-miR-1952    | 1.27  | 7.80E-01 | 8.66E-01 |
| mmu-miR-15a*    | 1.06  | 7.83E-01 | 8.66E-01 |
| mmu-miR-291b-5p | -1.15 | 7.88E-01 | 8.66E-01 |
| mmu-miR-872     | 1.03  | 7.97E-01 | 8.77E-01 |
| mmu-miR-30c-2*  | -1.07 | 8.15E-01 | 8.77E-01 |
| mmu-miR-188-3p  | 1.16  | 8.24E-01 | 8.79E-01 |
| mmu-miR-654-3p  | -1.12 | 8.27E-01 | 8.81E-01 |
| mmu-miR-103     | -1.05 | 8.39E-01 | 8.82E-01 |
| mmu-miR-682     | -1.12 | 8.42E-01 | 8.91E-01 |
| mmu-miR-20b*    | 1.05  | 8.46E-01 | 8.95E-01 |
| mmu-miR-466d-5p | -1.02 | 8.49E-01 | 8.98E-01 |
| mmu-miR-193*    | -1.12 | 8.62E-01 | 9.08E-01 |
| mmu-miR-496     | -1.05 | 8.67E-01 | 9.21E-01 |
| mmu-miR-154*    | 1.06  | 8.73E-01 | 9.31E-01 |
| mmu-miR-1199    | -1.05 | 8.84E-01 | 9.36E-01 |
| mmu-miR-10b     | -1.05 | 9.30E-01 | 9.47E-01 |
| mmu-miR-33*     | -1.02 | 9.34E-01 | 9.49E-01 |
| mmu-miR-720     | 1.02  | 9.59E-01 | 9.72E-01 |
| mmu-miR-378*    | -1.01 | 9.60E-01 | 9.72E-01 |
| mmu-miR-802     | 1.01  | 9.66E-01 | 9.76E-01 |
| mmu-miR-712     | -1.01 | 9.69E-01 | 9.77E-01 |
| mmu-miR-17*     | -1.01 | 9.74E-01 | 9.80E-01 |
| mmu-miR-671-3p  | 1.02  | 9.76E-01 | 9.80E-01 |
| mmu-miR-467h    | -1.01 | 9.82E-01 | 9.84E-01 |
| mmu-miR-199b*   | 1.00  | > 0.99   | > 0.99   |

**Supplementary Table 4.** Gen set enrichment analysis, KEGG and GO Biological process pathways.

| Kyoto Encyclopedia of Genes and Genomes (KEEG) pathways                                     |      |                                                                                      |         |                  |
|---------------------------------------------------------------------------------------------|------|--------------------------------------------------------------------------------------|---------|------------------|
| Name                                                                                        | Hits | Genes                                                                                | P-value | adjusted P-value |
| hsa04110 Cell cycle                                                                         | 6    | ORC4; E2F3; CDK6; CDC14B; CCND1; CCND2                                               | 0.0029  | 0.0441           |
| hsa04630 JAK-STAT signaling pathway                                                         | 6    | SOCS5; PDGFRA; OSMR; CCND1; CCND2; IFNAR2                                            | 0.0098  | 0.0441           |
| hsa05206 MicroRNAs in cancer                                                                | 9    | FOXP1; PDGFRA; E2F3; CDK6; PDCD4; CCND1; CCND2; BCL2L2; DICER1                       | 0.0084  | 0.0441           |
| hsa05202 Transcriptional misregulation in cancer                                            | 7    | ELK4; CCNT2; RUNX1T1; KMT2A; CCND2; CCNT1; H3F3B                                     | 0.0052  | 0.0441           |
| hsa04218 Cellular senescence                                                                | 5    | RASSF5; E2F3; CDK6; CCND1; CCND2                                                     | 0.0323  | 0.0646           |
| hsa05162 Measles                                                                            | 5    | CDK6; CCND1; CCND2; CSNK2A1; IFNAR2                                                  | 0.019   | 0.0646           |
| hsa04310 Wnt signaling pathway                                                              | 5    | CCND1; CCND2; NKD1; CSNK2A1; ZNRF3                                                   | 0.0323  | 0.0646           |
| hsa04934 Cushing syndrome                                                                   | 5    | E2F3; CDK6; CCND1; KMT2A; KMT2D                                                      | 0.0289  | 0.0646           |
| hsa05160 Hepatitis C                                                                        | 5    | E2F3; CDK6; CCND1; PPP2R1B; IFNAR2                                                   | 0.0289  | 0.0646           |
| hsa04141 Protein processing in endoplasmic reticulum                                        | 5    | SEC24A; SSR1; RAD23B; SEC61A2; DNAJC3                                                | 0.0368  | 0.0662           |
| hsa04151 PI3K-Akt signaling pathway                                                         | 8    | COL4A4; PDGFRA; OSMR; CDK6; CCND1; PPP2R1B; CCND2; IFNAR2                            | 0.0426  | 0.0697           |
| hsa04510 Focal adhesion                                                                     | 5    | COL4A4; PDGFRA; VCL; CCND1; CCND2                                                    | 0.0675  | 0.0851           |
| hsa05200 Pathways in cancer                                                                 | 10   | TPM3; RASSF5; COL4A4; PDGFRA; E2F3; CDK6; RUNX1T1; CCND1; CCND2; IFNAR2              | 0.0685  | 0.0851           |
| hsa05169 Epstein-Barr virus infection                                                       | 5    | E2F3; CDK6; CCND1; CCND2; IFNAR2                                                     | 0.0697  | 0.0851           |
| hsa05165 Human papillomavirus infection                                                     | 7    | COL4A4; ATP6V1A; CDK6; CCND1; PPP2R1B; CCND2; IFNAR2                                 | 0.0709  | 0.0851           |
| hsa04010 MAPK signaling pathway                                                             | 5    | ELK4; PDGFRA; TAOK1; RPS6KA3; DUSP9                                                  | 0.2119  | 0.2384           |
| hsa05168 Herpes simplex virus 1 infection                                                   | 5    | ZNF620; SRPK1; ZNF200; ZNF264; IFNAR2                                                | 0.5894  | 0.6241           |
| hsa01100 Metabolic pathways                                                                 | 12   | AZIN2; TRAK2; ATP6V1A; PDE4D; PGM3; SPTLC1; PANK1; KMT2A; ETNK1; KMT2D; ACOX1; PYCR1 | 0.839   | 0.839            |
| GO Biological process pathways                                                              |      |                                                                                      |         |                  |
| Name                                                                                        | Hits | Genes                                                                                | P-value | adjusted P-value |
| GO:0045737 positive regulation of cyclin-dependent protein serine/threonine kinase activity | 5    | CCNT2; CCNYL1; CCND1; CCND2; CCNT1                                                   | 0.0     | 0.0              |
| GO:0006457 protein folding                                                                  | 7    | GNAT1; TTC1; PPIL1; CDC37L1; RAD23B; CSNK2A1; FKBP1A                                 | 0.0008  | 0.0077           |
| GO:0007049 cell cycle                                                                       | 9    | EPB41; CCNT2; E2F3; PTP4A1; DMTF1; CCNT1; CSNK2A1; SIK1; RPS6KA3                     | 0.0011  | 0.0077           |
| GO:0016055 Wnt signaling pathway                                                            | 7    | CUL3; CCND1; CSNK1G1; NKD1; RNF138; CSNK2A1; ZNRF3                                   | 0.0029  | 0.0122           |
| GO:0000082 G1S transition of mitotic cell cycle                                             | 5    | ORC4; USP37; CUL3; CDK6; CCND1                                                       | 0.0035  | 0.0122           |
| GO:0006888 ER to Golgi vesicle-mediated transport                                           | 7    | MCFD2; CUL3; SEC24A; DCTN4; YKT6; TMED2; GOSR1                                       | 0.0034  | 0.0122           |
| GO:0006468 protein phosphorylation                                                          | 11   | MAP3K21; ACVR2A; SRPK1; CDK6; CCND1; CCND2; CCNT1; TAOK1; CSNK2A1; SIK1; CASK        | 0.0079  | 0.0237           |
| GO:0006974 cellular response to DNA damage stimulus                                         | 7    | PARP1; FOXP1; CBX3; CCND1; ZBTB4; TAOK1; ZBTB7A                                      | 0.0108  | 0.0284           |
| GO:0046777 protein autophosphorylation                                                      | 5    | DDR2; MAP3K21; PDGFRA; TAOK1; SIK1                                                   | 0.0289  | 0.0674           |
| GO:0015031 protein transport                                                                | 7    | MCFD2; CHMP3; ATG9A; YKT6; VPS33A; VPS53; GOSR1                                      | 0.0359  | 0.0754           |
| GO:0043687 post-translational protein modification                                          | 7    | FBXO44; SOCS5; CUL3; DCUN1D1; DNAJC3; FEM1B; DCUN1D3                                 | 0.0546  | 0.0838           |
| GO:0043066 negative regulation of apoptotic process                                         | 9    | SLC9A1; HIGD1A; PDCD4; CCND2; TM6IM4; DNAJC3; BCL2L2; ARHGDI1; RPS6KA3               | 0.0559  | 0.0838           |
| GO:0051301 cell division                                                                    | 7    | EPB41; CCNT2; USP37; CDK6; CCND1; CCND2; CCNT1                                       | 0.0552  | 0.0838           |
| GO:0008283 cell proliferation                                                               | 5    | GNAT1; CDV3; TBCK; PURB; H3F3B                                                       | 0.0558  | 0.0838           |
| GO:0006281 DNA repair                                                                       | 5    | CLSPN; PARP1; CDC14B; PAGR1; TAOK1                                                   | 0.0682  | 0.0938           |

|                                                          |   |                                                      |        |        |
|----------------------------------------------------------|---|------------------------------------------------------|--------|--------|
| GO:0016567 protein ubiquitination                        | 8 | SOCS5; CUL3; MSL2; FEM1B; ARIH1; MIB1; RNF138; ZNRF3 | 0.0715 | 0.0938 |
| GO:0007283 spermatogenesis                               | 7 | AZIN2; ACVR2A; CCNYL1; PGM3; RAD23B; BCL2L2; ACOX1   | 0.1109 | 0.137  |
| GO:0019221 cytokine-mediated signaling pathway           | 5 | SOCS5; OSMR; CCND1; NUMBL; IFNAR2                    | 0.1434 | 0.1634 |
| GO:0006511 ubiquitin-dependent protein catabolic process | 5 | USP37; CUL3; UBE4A; ARIH1; ZNRF3                     | 0.1478 | 0.1634 |
| GO:0035556 intracellular signal transduction             | 6 | RASSF5; SOCS5; PRKAR2A; SRPK1; SIK1; RPS6KA3         | 0.1618 | 0.1699 |
| GO:0016032 viral process                                 | 5 | PDGFRA; SRPK1; NUP98; CCNT1; RCOR1                   | 0.2914 | 0.2914 |
